# Supplementary material
Source: PubMed Central journal article supplement (PMC5351293)
Supplement: NIHMS848661-supplement-ESI.pdf [file NIHMS848661-supplement-ESI.pdf]

## Electronic Supplemental Information

### *Meso*-N-methylation of a porphyrinoid complex: Activating the H-atom transfer capability of an inert Re<sup>V</sup>(O) corrolazine

*Evan E. Joslin, Jan Paulo T. Zaragoza, Maxime A. Siegler, and David P. Goldberg\**

Department of Chemistry, The Johns Hopkins University, 3400 N. Charles Street, Baltimore,  
MD 21218, USA

\*Email: [dgp@jhu.edu](mailto:dgp@jhu.edu)

**General Procedures.** All reactions were performed using dry solvents and standard Schlenk techniques unless otherwise noted. Dichloromethane and toluene were purified via a Pure-Solv solvent purification system from Innovative Technologies. CD<sub>2</sub>Cl<sub>2</sub> was obtained from Cambridge Isotopes, Inc. The synthesis of Re<sup>V</sup>(O)(TBP<sub>8</sub>Cz) (TBP<sub>8</sub>Cz = octakis(*p*-*tert*-butylphenyl)corrolazinato),<sup>1</sup> [H(OEt<sub>2</sub>)<sub>2</sub>]<sup>+</sup>[B(C<sub>6</sub>F<sub>5</sub>)<sub>4</sub>]<sup>-</sup> (HBArF),<sup>2</sup> 2,2,6,6-tetramethylpiperidine hydroxylamine (TEMPOH)<sup>3</sup> and its deuterated analogue TEMPOD, followed published literature procedures. All other reagents were purchased from commercial sources and used without further purification.

**Instrumentation.** <sup>1</sup>H NMR spectra were recorded on a Bruker Avance 400 MHz or a Bruker Avance 600 MHz spectrometer. All <sup>1</sup>H spectra were referenced against residual solvent proton signals. <sup>19</sup>F NMR spectra were recorded on a Bruker 300 MHz (operating frequency 282 MHz) spectrometer and referenced against an external standard of C<sub>6</sub>F<sub>6</sub> (δ = -164.9 ppm). Electron paramagnetic resonance (EPR) spectra were recorded with a Bruker EMX spectrometer equipped with a Bruker ER 041 X G microwave bridge. Elemental analyses were performed at Atlantic Microlab, Inc. in Norcross, GA. Electrochemical experiments were performed under an argon atmosphere using a BAS 100B electrochemical analyzer. Cyclic voltammograms were recorded in degassed CH<sub>2</sub>Cl<sub>2</sub> using a standard three-electrode system consisting of a glassy carbon working electrode, a Ag/AgNO<sub>3</sub> non-aqueous reference electrode (0.01 M AgNO<sub>3</sub> with 0.1 M TBAPF<sub>6</sub> in CH<sub>3</sub>CN), and a platinum wire counter electrode and tetrabutylammonium hexafluorophosphate (TBAPF<sub>6</sub>, 0.1 M) as supporting electrolyte. All potentials are reported versus Fc<sup>+</sup>/Fc. UV-vis measurements were performed on a Hewlett-Packard 8453 diode-array spectrophotometer with a 3.5 mL air-free quartz cuvette (path length = 1 cm) fitted with a glass stopper or rubber septum. A 400 nm longpass filter was employed to prevent photo-

decomposition by placing the filter directly between the sample quartz cuvette and the spectrophotometer light source. LDI-MS was collected on a Bruker Autoflex III/TOF/TOF instrument equipped with a nitrogen laser at 335 nm using an MTP 384 ground steel target plate. ATR-IR spectra were collected from a ThermoNicolet Nexus 670 FTIR Spectrometer equipped with a KRS-5 ATR. IR samples were dissolved in a minimal amount of CH<sub>2</sub>Cl<sub>2</sub> and spotted on the ATR and allowed to dry prior to collecting data.

**Computational Methods.** Computational studies on the rhenium complexes were performed using the *Orca* program package.<sup>4</sup> Geometry optimizations and frequency calculations were performed using the hybrid density functional theory PBE0<sup>5,6</sup> with the LANL2TZ<sup>7</sup> basis set on Re and the 6-31G\*\*<sup>8,9</sup> basis set on the remaining atoms, as suggested by Deakyne, and co-workers<sup>10</sup> for monooxorhenium(V) complexes. The initial geometry of the rhenium-oxo corrolazine <sup>1</sup>[Re<sup>V</sup>(O)(CzH<sub>6</sub>P<sub>2</sub>)], (CzH<sub>6</sub>P<sub>2</sub> = diphenylcorrolazinato) was obtained from the Re<sup>V</sup>(O)(TBP<sub>8</sub>Cz) X-ray crystal structure with six of the *p-tert*-butylphenyl groups replaced with hydrogens, and the two closest to one *meso*-N replaced with phenyls to account for the steric strain upon methylation. Subsequent calculations were achieved by manually adding a proton or a methyl group on the *meso*-N position of the corrolazine ligand, and adding or removing an electron, then allowing the structures to optimize without constraints. Optimized geometries were used for frequency calculations at the same level of theory to ensure the local minimum nature of the geometry (without any imaginary frequencies).

**[Re<sup>V</sup>(O)(*N*-MeTBP<sub>8</sub>Cz)]<sup>+</sup>[OTf]<sup>-</sup> (1).** An amount of Re<sup>V</sup>(O)(TBP<sub>8</sub>Cz) (0.014 g, 0.0091 mmol) was dissolved in 5 mL of toluene. MeOTf (51 μL, 0.45 mmol) was added by syringe and the reaction was refluxed for 12 h during which time the solution turned from bright green to red-brown. Additional MeOTf (51 μL, 0.45 mmol) was added to the reaction mixture and the

reaction mixture was allowed to reflux for another 12 h. The reaction was cooled to 23 °C and the solvent was removed via rotary vacuum. The residual solid was dissolved in a minimal amount of CH<sub>2</sub>Cl<sub>2</sub> and loaded onto a silica gel preparatory plate. The plate was developed with CH<sub>2</sub>Cl<sub>2</sub>/EtOAc (8:2 v/v). The brown band (R<sub>f</sub> = 0.08) was scraped off the plate and the silica was placed in a CH<sub>2</sub>Cl<sub>2</sub>/EtOAc (8:2 v/v) solution to solubilize the product. The silica was then removed by filtration and the solution was dried under vacuum to yield a brown-red solid (0.0059 g, 38 % yield). <sup>1</sup>H NMR (400 MHz, CD<sub>2</sub>Cl<sub>2</sub>) δ 8.34 (dd, <sup>3</sup>J<sub>HH</sub> = 8, 6 Hz, 4H, Ar-H), 8.14 (d, <sup>3</sup>J<sub>HH</sub> = 8 Hz, 3H, Ar-H), 7.99 (d, <sup>3</sup>J<sub>HH</sub> = 8 Hz, 2H, Ar-H), 7.75-7.46 (m, 16H, Ar-H), 7.28 (bs, 3H, Ar-H), 7.23 (d, <sup>3</sup>J<sub>HH</sub> = 8 Hz, 2H, Ar-H), 7.07 (d, <sup>3</sup>J<sub>HH</sub> = 8 Hz, 2H, Ar-H), 5.01 (s, 3H, meso-CH<sub>3</sub>), 1.52 (s, 9H, Ph-C(CH<sub>3</sub>)<sub>3</sub>), 1.50 (s, 9H, Ph-C(CH<sub>3</sub>)<sub>3</sub>), 1.47 (2s overlapping, 18H, Ph-C(CH<sub>3</sub>)<sub>3</sub>), 1.44 (s, 9H, Ph-C(CH<sub>3</sub>)<sub>3</sub>), 1.39 (s, 9H, Ph-C(CH<sub>3</sub>)<sub>3</sub>), 1.36 (s, 9H, Ph-C(CH<sub>3</sub>)<sub>3</sub>), 1.26 (s, 9H, Ph-C(CH<sub>3</sub>)<sub>3</sub>). <sup>19</sup>F NMR (282 MHz, CD<sub>2</sub>Cl<sub>2</sub>) δ -81.22. UV-Vis (CH<sub>2</sub>Cl<sub>2</sub>) λ<sub>max</sub> [nm] (ε × 10<sup>-4</sup>) 464 (4.9), 732 (2.5). FT-IR (cm<sup>-1</sup>, ATR) 1463, 1363, 1270, 1252, 1161, 1108, 1030, 1001, 984, 837. MS (MALDI) *m/z* = 1572.53 (M<sup>+</sup>). Anal. Calcd. for C<sub>98</sub>H<sub>107</sub>F<sub>3</sub>N<sub>7</sub>O<sub>4</sub>ReS•CH<sub>2</sub>Cl<sub>2</sub>•EtOAc: C, 65.27; H, 6.22; N, 5.17. Found: C, 65.01; H, 6.58; N, 4.84.

[Re<sup>V</sup>(O)(N-MeTBP<sub>8</sub>Cz-H)]<sup>2+</sup>[BArF]<sub>2</sub>. [Re<sup>V</sup>(O)(N-MeTBP<sub>8</sub>Cz)]<sup>+</sup>[OTf]<sup>-</sup> (**1**) (0.0027 g, 0.0016 mmol) was dissolved in *c.a.* 1 mL of CH<sub>2</sub>Cl<sub>2</sub>, and HBarF (0.0027 g, 0.0033 mmol) was added, causing a color change from dark brown to bright pink. The solution was placed in an NMR tube and layered with *n*-heptane, and afforded X-ray quality crystals after approximately 1 month.

**Single Crystal X-ray Crystallography.** All reflection intensities were measured at 110(2) K for [Re<sup>V</sup>(O)(N-MeTBP<sub>8</sub>Cz)(H)]<sup>2+</sup>[BArF]<sub>2</sub> (**2**) using a SuperNova diffractometer (equipped with Atlas detector) with Cu K $\alpha$  radiation ( $\lambda$  = 1.54178 Å) under the program CrysAlisPro (Version

1.171.36.32, Agilent Technologies, 2013). The same program was used to refine the cell dimensions and for data reduction. The structure was solved with the program SHELXS-2014/7 and was refined on  $F^2$  with SHELXL-2014/7.<sup>11</sup> Analytical numeric absorption correction using a multifaceted crystal model was applied using CrysAlisPro. The temperature of the data collection was controlled using the system Cryojet (manufactured by Oxford Instruments). The H atoms were placed at calculated positions using the instructions AFIX 23, AFIX 43, AFIX 137 with isotropic displacement parameters having values 1.2 or 1.5  $U_{eq}$  of the attached C atoms. Crystallographic data for  $[\text{Re}^{\text{V}}(\text{O})(N\text{-MeTBP}_8\text{Cz})(\text{H})]^{2+}[\text{BARF}]_2^-$  has been deposited with the Cambridge Crystallographic Data Center (CCDC) with the deposition number of 1510757.

Six of the eight *para*-tert-butylphenyl groups and one of the two BARF counterions are found to be disordered over two orientations. All occupancy factors are provided in the .cif file. The crystal lattice also includes disordered heptane lattice solvent molecules. Two molecules (one is found at a site of inversion symmetry and its occupancy factor was constrained to be 0.5) have been added into the structure model, but the remaining contribution of the third heptane solvent molecule was removed in the final refinement using the SQUEEZE procedure in Platon.<sup>12</sup>

Additional Note: checkCIF shows one Alert Level B “Large U3/U1 Ratio for Average U(i,j) Tensor”. Although it is a bit unusual, it might be inherently due to the long range order in the crystal, as there seems to be some significant amount of disorder in the crystal lattice. This alert does not affect the validity of the model.

**General Procedure for EPR Spectroscopy.** To an amount of  $[\text{Re}^{\text{V}}(\text{O})(N\text{-MeTBP}_8\text{Cz})]^{+}[\text{OTf}]^{-}$  (**1**) (0.2 - 0.89 mM) dissolved in  $\text{CH}_2\text{Cl}_2$  was added phenylhydrazine (0.56 - 1.6 M) in  $\text{CH}_2\text{Cl}_2$ . A subtle color change from brown to red-brown was observed and the completion of the reaction was checked by UV-vis spectroscopy. The solution was loaded into

an EPR tube, and an EPR spectrum was obtained. EPR parameters: T = 294 K, freq. = 9.77 GHz, power = 2.012 mW, mod. amp. = 1 G, mod. freq. = 100 kHz, receiver gain =  $5.02 \times 10^3$ , NS = 2.

**UV-vis kinetics for the reaction of  $[\text{Re}^{\text{V}}(\text{O})(\text{N-MeTBP}_8\text{Cz})]^+[\text{OTf}]^-$  (**1**) with TEMPOH(D).**  $[\text{Re}^{\text{V}}(\text{O})(\text{N-MeTBP}_8\text{Cz})]^+[\text{OTf}]^-$  (**1**) (13  $\mu\text{M}$ ,  $\text{CH}_2\text{Cl}_2$ ) was reacted with TEMPOH(D) (0.03 – 0.18 M). The reaction was monitored by UV-vis spectroscopy and showed the decay of  $[\text{Re}^{\text{V}}(\text{O})(\text{N-MeTBP}_8\text{Cz})]^+[\text{OTf}]^-$  (**1**) ( $\lambda_{\text{max}} = 467, 732 \text{ nm}$ ) and production of  $[\text{Re}^{\text{V}}(\text{O})(\text{N-MeTBP}_8\text{Cz})]^+$  (**3**) ( $\lambda_{\text{max}} = 440, 489, 920 \text{ nm}$ ). The pseudo first order rate constants,  $k_{\text{obs}}$ , were obtained by nonlinear least-squares fitting of the growth of  $[\text{Re}^{\text{V}}(\text{O})(\text{N-MeTBP}_8\text{Cz})]^+$  (**3**) and decay of  $[\text{Re}^{\text{V}}(\text{O})(\text{N-MeTBP}_8\text{Cz})]^+[\text{OTf}]^-$  (**1**) plotted as absorbance (Abs) versus time (t). The data were fit to the equation  $\text{Abs}_t = \text{Abs}_f + (\text{Abs}_0 - \text{Abs}_f)\exp(-k_{\text{obs}}t)$ , where  $\text{Abs}_0$  and  $\text{Abs}_f$  are initial and final absorbance, respectively. Pseudo-first order  $k_{\text{obs}}$  values were obtained and exhibited a linear correlation with substrate concentrations. Second-order rate constants ( $k_2$ ) were obtained from the slope of the best-fit line from a plot of  $k_{\text{obs}}$  versus substrate concentration.

**Table S1.** Comparison of Selected Bond Distances (Å) and Angles (deg) for  $[\text{Re}^{\text{V}}(\text{O})(\text{N-MeTBP}_8\text{Cz})(\text{H})]^{2+}[\text{BArF}]_2^-$  (**2**) and  $\text{Re}^{\text{V}}(\text{O})(\text{TBP}_8\text{Cz})$ .<sup>1</sup>

|                                             | $[[\text{Re}^{\text{V}}(\text{O})(\text{N-MeTBP}_8\text{Cz})(\text{H})]^{2+}[\text{BArF}]_2^-$ ( <b>2</b> ) | $\text{Re}^{\text{V}}(\text{O})(\text{TBP}_8\text{Cz})$ |
|---------------------------------------------|-------------------------------------------------------------------------------------------------------------|---------------------------------------------------------|
| Re–O                                        | 1.6643(17)                                                                                                  | 1.682(5)                                                |
| Re–N <sub>ave</sub>                         | 1.991                                                                                                       | 1.976                                                   |
| Re–(N <sub>pyrrole</sub> ) <sub>plane</sub> | 0.744                                                                                                       | 0.739                                                   |
| Re–(23-atom) <sub>core</sub>                | 0.959                                                                                                       | 1.00                                                    |
| N–CH3                                       | 1.497(4)                                                                                                    | --                                                      |
| C1–N7                                       | 1.362(3)                                                                                                    | 1.294(10)                                               |
| C16–N7                                      | 1.376(4)                                                                                                    | 1.299(10)                                               |
| C1–N7–CH3                                   | 117.9(2)                                                                                                    | --                                                      |
| C16–N7–CH3                                  | 117.7(2)                                                                                                    | --                                                      |
| C1–N7–C16                                   | 124.3(2)                                                                                                    | --                                                      |
| C $\alpha$ –C $\alpha$ (C4–C5)              | 1.402(3)                                                                                                    | 1.522(9)                                                |
| N1–Re1–N2                                   | 75.06(8)                                                                                                    | 76.8(4)                                                 |
| N2–Re1–N4                                   | 83.43(8)                                                                                                    | 84.6(3)                                                 |
| N4–Re1–N6                                   | 86.59(9)                                                                                                    | 84.7(3)                                                 |
| N6–Re1–N1                                   | 82.73(8)                                                                                                    | 81.8(4)                                                 |

**Table S2.** Calculated vibrational modes for  $\text{Re}^{\text{V}}(\text{O})$  complexes. Relevant  $\nu(\text{Re-O})$  modes are highlighted in red.

|      | $^1[\text{Re}^{\text{V}}(\text{O})(\text{CzH}_6\text{P}_2)]$ | $^1[\text{Re}^{\text{V}}(\text{O})(\text{CzH}_6\text{P}_2)(\text{CH}_3)]^+$ |
|------|--------------------------------------------------------------|-----------------------------------------------------------------------------|
| Mode | Freq. (cm <sup>-1</sup> )                                    | Freq. (cm <sup>-1</sup> )                                                   |
| 7    | 36.71                                                        |                                                                             |
| 8    | 40.66                                                        | 37.9                                                                        |
| 9    | 49.8                                                         | 43.68                                                                       |
| 10   | 58.17                                                        | 47.43                                                                       |
| 11   | 85.95                                                        | 71.59                                                                       |
| 12   | 90.36                                                        | 87.18                                                                       |
| 13   | 99.11                                                        | 92.16                                                                       |
| 14   | 120.88                                                       | 105.52                                                                      |
| 15   | 139.65                                                       | 130.35                                                                      |
| 16   | 144.6                                                        | 137.55                                                                      |
| 17   | 185.22                                                       | 144.23                                                                      |
| 18   | 190.01                                                       | 158.72                                                                      |
| 19   | 201.39                                                       | 178.6                                                                       |
| 20   | 224.19                                                       | 188.96                                                                      |
| 21   | 230.69                                                       | 214.2                                                                       |
| 22   | 238.75                                                       | 224.81                                                                      |
| 23   | 249.74                                                       | 235.22                                                                      |
| 24   | 253.25                                                       | 239.79                                                                      |

|    |        |        |
|----|--------|--------|
| 25 | 274.69 | 242.99 |
| 26 | 283.22 | 251.89 |
| 27 | 297.9  | 272.32 |
| 28 | 306.5  | 281.82 |
| 29 | 324.13 | 287.44 |
| 30 | 330.64 | 310.42 |
| 31 | 358.54 | 322.9  |
| 32 | 391.98 | 333.66 |
| 33 | 398.1  | 379.04 |
| 34 | 412.19 | 393.05 |
| 35 | 414.15 | 409.45 |
| 36 | 417.9  | 413.55 |
| 37 | 454.75 | 414.65 |
| 38 | 462.59 | 424.86 |
| 39 | 476.09 | 430.68 |
| 40 | 483.57 | 437.24 |
| 41 | 494.58 | 452.03 |
| 42 | 514.21 | 466.7  |
| 43 | 532.79 | 472.54 |
| 44 | 549.84 | 482.87 |
| 45 | 588.95 | 510.37 |
| 46 | 605.45 | 534.05 |
| 47 | 612.72 | 547.26 |
| 48 | 630.57 | 559.04 |
| 49 | 632.14 | 584.32 |
| 50 | 653.41 | 601.44 |
| 51 | 677.7  | 627.14 |
| 52 | 685.98 | 629.42 |
| 53 | 696.12 | 650.95 |
| 54 | 699.12 | 658.54 |
| 55 | 707.82 | 679.64 |
| 56 | 710.56 | 693.42 |
| 57 | 716.98 | 694.16 |
| 58 | 733.55 | 711.19 |
| 59 | 741.46 | 718.99 |
| 60 | 743.18 | 721.1  |
| 61 | 748.63 | 722.58 |
| 62 | 762.37 | 734.18 |
| 63 | 768.95 | 741.89 |
| 64 | 790.15 | 744.39 |
| 65 | 792.85 | 748.5  |



|     |                           |                           |
|-----|---------------------------|---------------------------|
| 66  | 798.06                    | 753.73                    |
| 67  | 808.47                    | 778.57                    |
| 68  | 810.48                    | 787.93                    |
| 69  | 828.32                    | 795.82                    |
| 70  | 842.61                    | 804.24                    |
| 71  | 856.07                    | 818.3                     |
| 72  | 858.8                     | 826.59                    |
| 73  | 864.76                    | 841.44                    |
| 74  | 872.85                    | 849.94                    |
| 75  | 882.81                    | 866.92                    |
| 76  | 917.26                    | 870.91                    |
| 77  | 921.14                    | 884.73                    |
| 78  | 939.66                    | 892.44                    |
| 79  | 943.92                    | 918.21                    |
| 80  | 944.75                    | 947.99                    |
| 81  | 982.7                     | 949.23                    |
| 82  | 988.37                    | 949.6                     |
| 83  | 1004.71                   | 962.62                    |
| 84  | 1010.16                   | 991.64                    |
| 85  | 1018.48                   | 991.85                    |
| 86  | 1018.64                   | 993.65                    |
| 87  | 1030.42                   | 1016.93                   |
| 88  | 1047.9                    | 1019.5                    |
| 89  | <b>1053.63<br/>(Re-O)</b> | 1022.72                   |
| 90  | 1055.22                   | 1023.55                   |
| 91  | 1058.32                   | 1023.79                   |
| 92  | 1062.27                   | 1044.85                   |
| 93  | 1064.73                   | 1056.97                   |
| 94  | 1076.08                   | <b>1063.43<br/>(Re-O)</b> |
| 95  | 1083.05                   | 1064.2                    |
| 96  | 1084.75                   | 1072.2                    |
| 97  | 1094                      | 1076.01                   |
| 98  | 1116.17                   | 1077.22                   |
| 99  | 1118.35                   | 1087.1                    |
| 100 | 1122.07                   | 1090.38                   |
| 101 | 1169.02                   | 1116.07                   |
| 102 | 1187.67                   | 1116.31                   |
| 103 | 1188.27                   | 1120.49                   |
| 104 | 1197.08                   | 1140.32                   |
| 105 | 1212.85                   | 1152.99                   |
| 106 | 1214.73                   | 1157.27                   |

|     |         |         |
|-----|---------|---------|
| 107 | 1242.5  | 1171.95 |
| 108 | 1254.99 | 1192.7  |
| 109 | 1272.19 | 1193.98 |
| 110 | 1284.94 | 1209.4  |
| 111 | 1299.58 | 1210.22 |
| 112 | 1311.8  | 1220.52 |
| 113 | 1334.14 | 1249.13 |
| 114 | 1340.47 | 1257.98 |
| 115 | 1344.16 | 1280.51 |
| 116 | 1361.1  | 1285.01 |
| 117 | 1376.52 | 1308.56 |
| 118 | 1386.34 | 1329.23 |
| 119 | 1388.42 | 1335.56 |
| 120 | 1393.12 | 1339.67 |
| 121 | 1402.48 | 1341.69 |
| 122 | 1439.98 | 1362.95 |
| 123 | 1443.02 | 1368.04 |
| 124 | 1481.26 | 1380.4  |
| 125 | 1488.6  | 1381.63 |
| 126 | 1491.28 | 1389.13 |
| 127 | 1500.63 | 1398.76 |
| 128 | 1515.37 | 1426.8  |
| 129 | 1523.9  | 1440.16 |
| 130 | 1542.33 | 1449.9  |
| 131 | 1553.69 | 1473.19 |
| 132 | 1561.86 | 1489.78 |
| 133 | 1575.93 | 1492.37 |
| 134 | 1580.09 | 1497.69 |
| 135 | 1593.04 | 1501.71 |
| 136 | 1604.74 | 1507.21 |
| 137 | 1617.19 | 1517.45 |
| 138 | 1634.39 | 1520.89 |
| 139 | 1654.43 | 1529.06 |
| 140 | 1655.85 | 1547.59 |
| 141 | 1683.31 | 1564.43 |
| 142 | 1684.36 | 1571.73 |
| 143 | 3204.77 | 1583.84 |
| 144 | 3206.94 | 1594.12 |
| 145 | 3212.88 | 1609.27 |
| 146 | 3214.57 | 1619.34 |
| 147 | 3222.02 | 1644.86 |

|     |         |         |
|-----|---------|---------|
| 148 | 3223.83 | 1653.78 |
| 149 | 3233.5  | 1654.25 |
| 150 | 3234.85 | 1679.89 |
| 151 | 3250.65 | 1680.74 |
| 152 | 3255.3  | 3125.52 |
| 153 | 3280.5  | 3205.66 |
| 154 | 3281.29 | 3208.77 |
| 155 | 3284.58 | 3216.2  |
| 156 | 3293.57 | 3217.16 |
| 157 | 3298.42 | 3225.93 |
| 158 | 3302.38 | 3226.24 |
| 159 |         | 3230.23 |
| 160 |         | 3234.47 |
| 161 |         | 3235.23 |
| 162 |         | 3245.13 |
| 163 |         | 3245.53 |
| 164 |         | 3253.94 |
| 165 |         | 3288.26 |
| 166 |         | 3291.98 |
| 167 |         | 3292.15 |
| 168 |         | 3298.92 |
| 169 |         | 3303.98 |
| 170 |         | 3308.22 |
| 171 |         |         |
| 172 |         |         |
| 173 |         |         |

**Table S3.** Crystallographic Data for **2**.

|                                                                                     |                                                                                                                                                                                                                                                                                                                                                                      |
|-------------------------------------------------------------------------------------|----------------------------------------------------------------------------------------------------------------------------------------------------------------------------------------------------------------------------------------------------------------------------------------------------------------------------------------------------------------------|
| Crystal data                                                                        |                                                                                                                                                                                                                                                                                                                                                                      |
| Chemical formula                                                                    | C <sub>97</sub> H <sub>108</sub> N <sub>7</sub> ORe·2(C <sub>24</sub> BF <sub>20</sub> )·1.414(C <sub>7</sub> H <sub>16</sub> )                                                                                                                                                                                                                                      |
| $M_r$                                                                               | 3073.83                                                                                                                                                                                                                                                                                                                                                              |
| Crystal system, space group                                                         | Triclinic, <i>P</i> -1                                                                                                                                                                                                                                                                                                                                               |
| Temperature (K)                                                                     | 110                                                                                                                                                                                                                                                                                                                                                                  |
| $a, b, c$ (Å)                                                                       | 17.92851 (19), 18.50308 (19), 24.9906 (2)                                                                                                                                                                                                                                                                                                                            |
| $\alpha, \beta, \gamma$ (°)                                                         | 93.4898 (8), 107.0384 (9), 108.1775 (9)                                                                                                                                                                                                                                                                                                                              |
| $V$ (Å <sup>3</sup> )                                                               | 7424.19 (13)                                                                                                                                                                                                                                                                                                                                                         |
| $Z$                                                                                 | 2                                                                                                                                                                                                                                                                                                                                                                    |
| Radiation type                                                                      | Cu $K\alpha$                                                                                                                                                                                                                                                                                                                                                         |
| $\mu$ (mm <sup>-1</sup> )                                                           | 2.50                                                                                                                                                                                                                                                                                                                                                                 |
| Crystal size (mm)                                                                   | 0.30 × 0.29 × 0.20                                                                                                                                                                                                                                                                                                                                                   |
| Data collection                                                                     |                                                                                                                                                                                                                                                                                                                                                                      |
| Diffractometer                                                                      | SuperNova, Dual, Cu at zero, Atlas                                                                                                                                                                                                                                                                                                                                   |
| Absorption correction                                                               | Analytical<br>CrysAlis PRO, Agilent Technologies, Version 1.171.36.32 (release 02-08-2013<br>CrysAlis171 .NET) (compiled Aug 2 2013,16:46:58) Analytical numeric absorption<br>correction using a multifaceted crystal model based on expressions derived by R.C.<br>Clark & J.S. Reid. (R. C. Clark, and J. S. Reid, <i>Acta Cryst.</i> 1995, <b>A51</b> , 887-897) |
| $T_{\min}, T_{\max}$                                                                | 0.563, 0.715                                                                                                                                                                                                                                                                                                                                                         |
| No. of measured,<br>independent and<br>observed [ $I > 2\sigma(I)$ ]<br>reflections | 96114, 29003, 26868                                                                                                                                                                                                                                                                                                                                                  |
| $R_{\text{int}}$                                                                    | 0.026                                                                                                                                                                                                                                                                                                                                                                |
| $(\sin \theta/\lambda)_{\text{max}}$ (Å <sup>-1</sup> )                             | 0.617                                                                                                                                                                                                                                                                                                                                                                |
| Refinement                                                                          |                                                                                                                                                                                                                                                                                                                                                                      |
| $R[F^2 > 2\sigma(F^2)], wR(F^2), S$                                                 | 0.036, 0.098, 1.04                                                                                                                                                                                                                                                                                                                                                   |
| No. of reflections                                                                  | 29003                                                                                                                                                                                                                                                                                                                                                                |
| No. of parameters                                                                   | 2857                                                                                                                                                                                                                                                                                                                                                                 |
| No. of restraints                                                                   | 4061                                                                                                                                                                                                                                                                                                                                                                 |
| H-atom treatment                                                                    | H-atom parameters constrained                                                                                                                                                                                                                                                                                                                                        |
| $\Delta\rho_{\text{max}}, \Delta\rho_{\text{min}}$ (e Å <sup>-3</sup> )             | 0.86, -1.21                                                                                                                                                                                                                                                                                                                                                          |

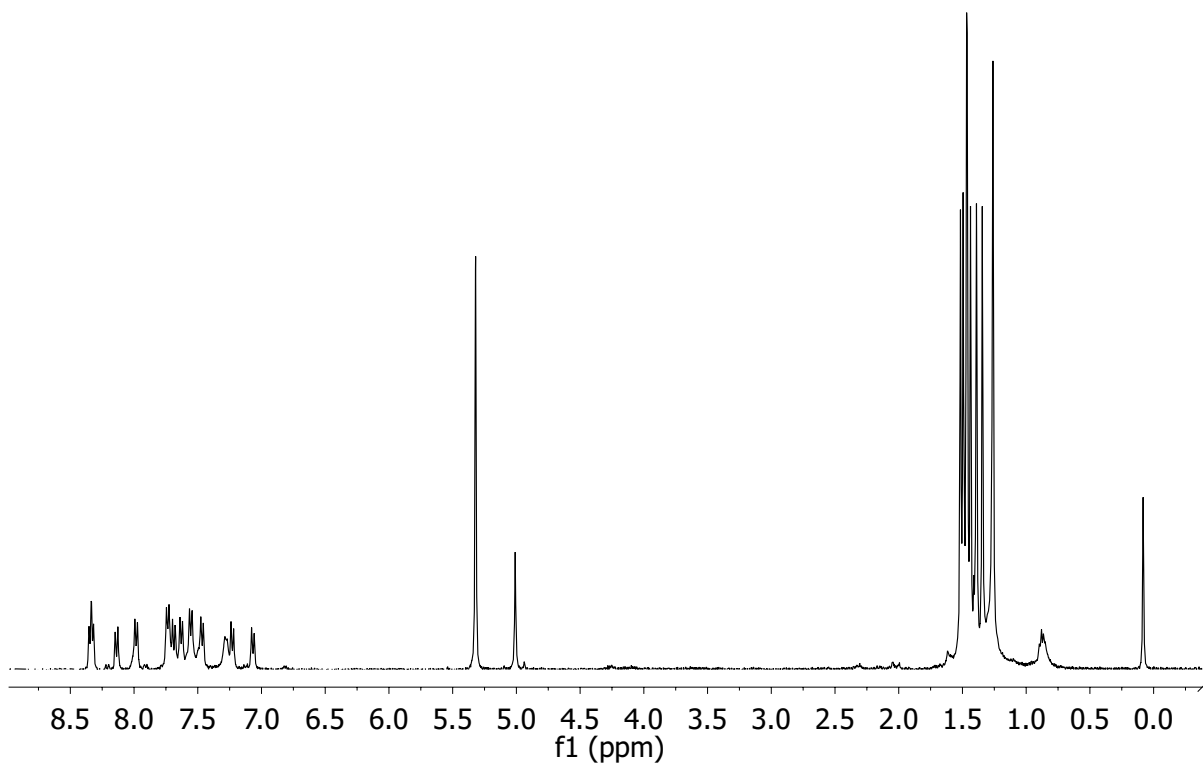

**Figure S1.**  $^1\text{H}$  NMR spectrum of  $[\text{Re}^{\text{V}}(\text{O})(N\text{-MeTBP}_8\text{Cz})]^+[\text{OTf}]^-$  (**1**) in  $\text{CD}_2\text{Cl}_2$ .

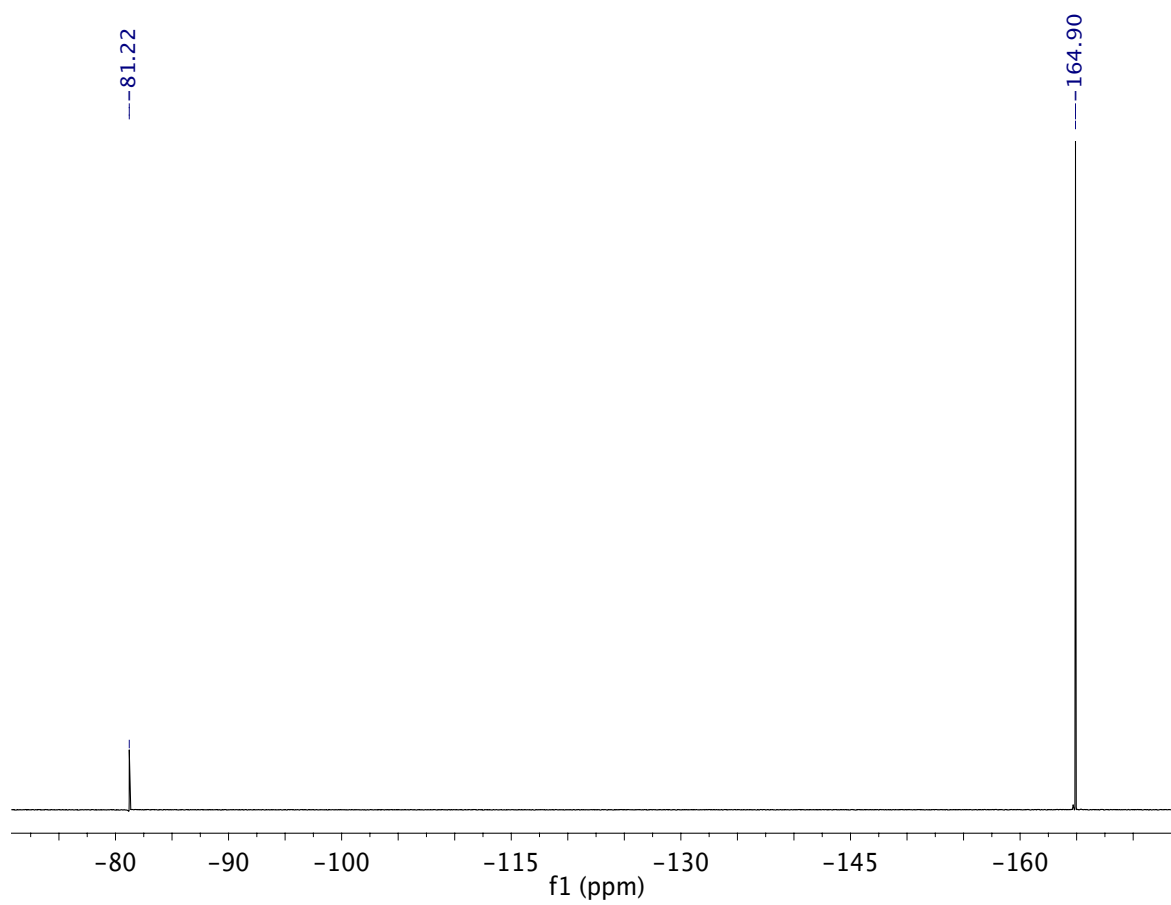

**Figure S2.**  $^{19}\text{F}$  NMR spectrum of  $[\text{Re}^{\text{V}}(\text{O})(\text{N-MeTBP}_8\text{Cz})]^+[\text{OTf}]^-$  (**1**) in  $\text{CD}_2\text{Cl}_2$ . Chemical shifts were calibrated versus the standard  $\text{C}_6\text{F}_6$  at -164.9 ppm.

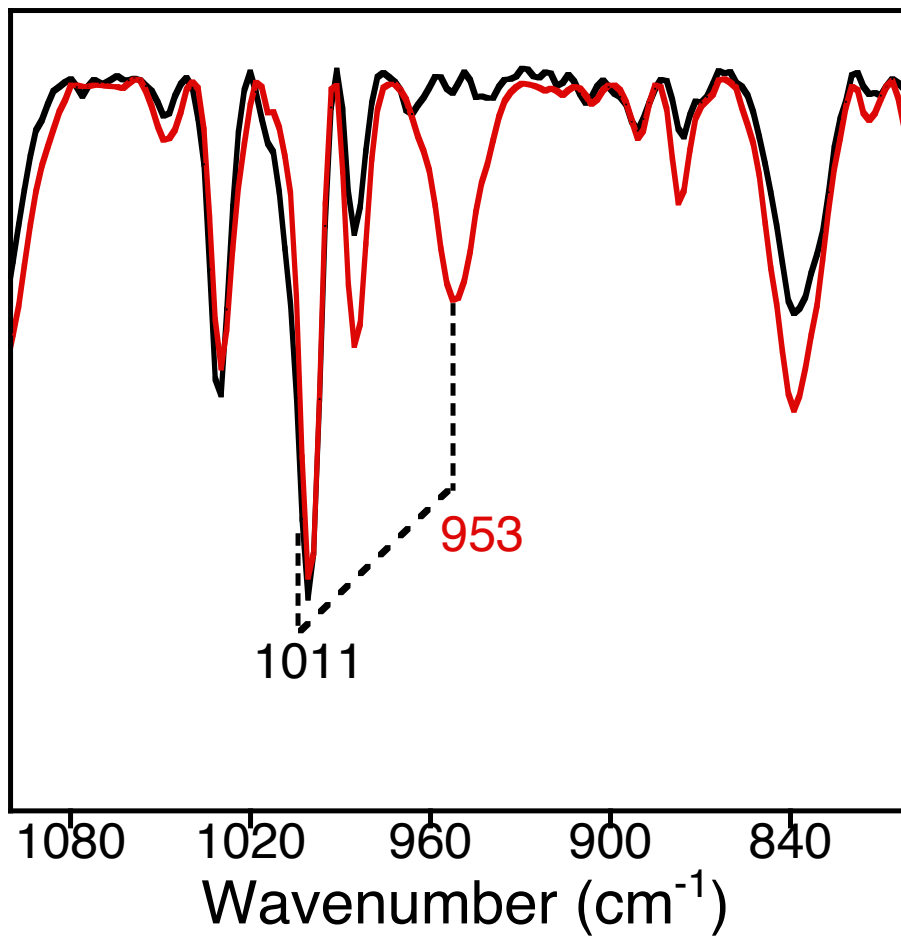

**Figure S3.** ATR-IR spectra (850 - 1100 cm<sup>-1</sup>) of [Re<sup>V</sup>(<sup>18</sup>O)(*N*-MeTBP<sub>8</sub>Cz)]<sup>+</sup>[OTf]<sup>-</sup> (red) and [Re<sup>V</sup>(<sup>16</sup>O)(*N*-MeTBP<sub>8</sub>Cz)]<sup>+</sup>[OTf]<sup>-</sup> (black).

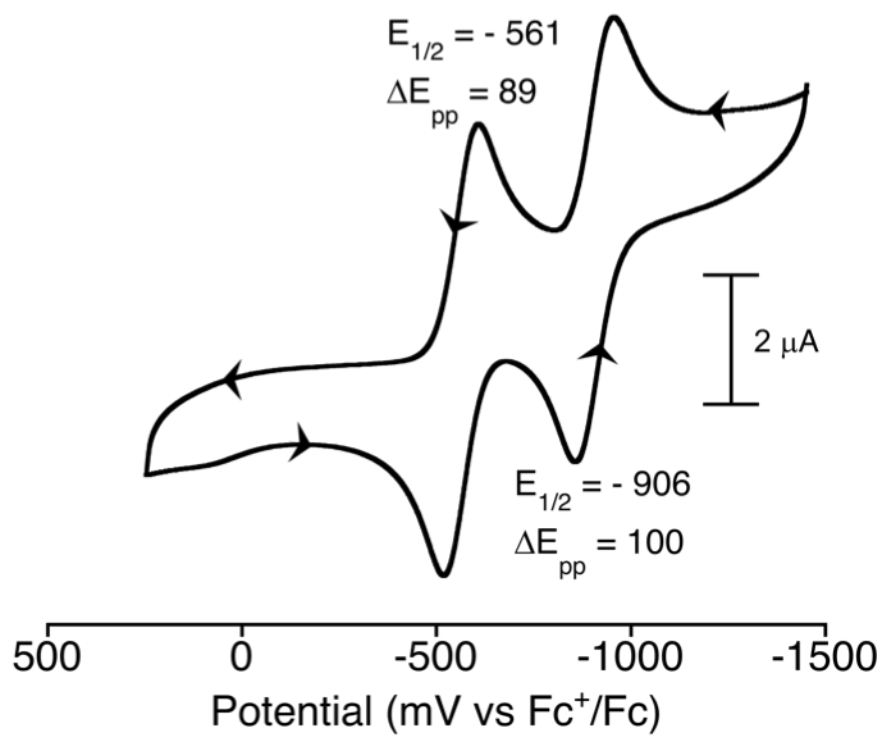

**Figure S4.** Cyclic voltammogram for  $[\text{Re}^{\text{V}}(\text{O})(N\text{-MeTBP}_8\text{Cz})]^+[\text{OTf}]^-$  (**1**) (0.8 mM) in  $\text{CH}_2\text{Cl}_2$  with 0.1 M  $\text{Bu}_4\text{N}^+\text{PF}_6^-$  electrolyte at  $50 \text{ mV s}^{-1}$  scan rate.



a)

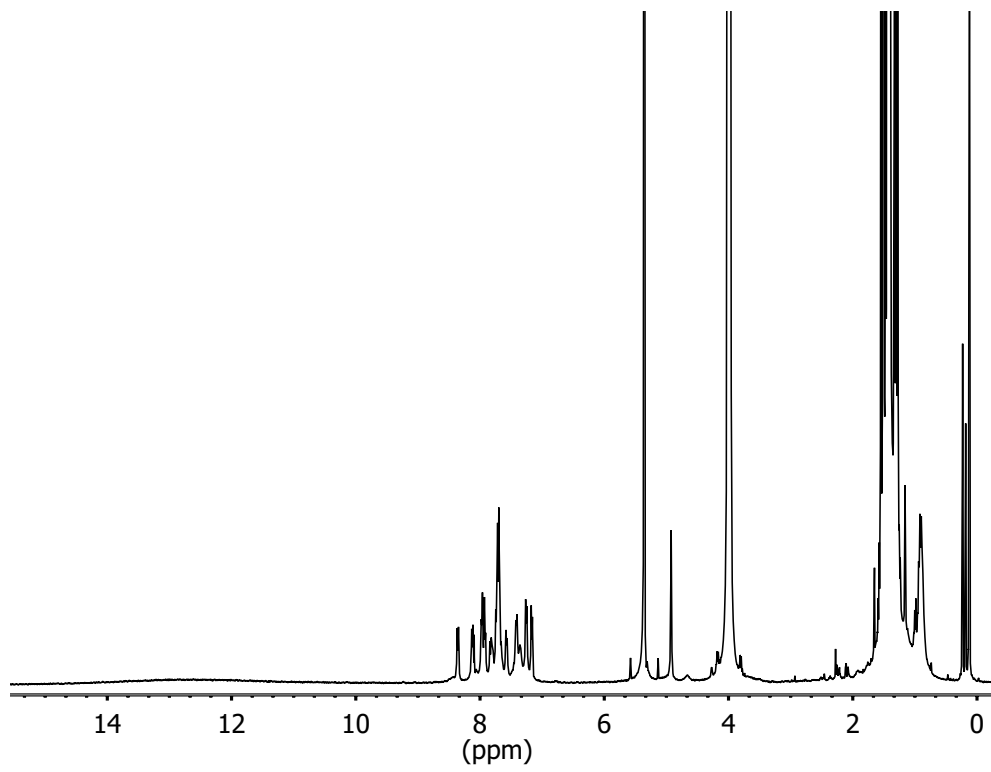

b)

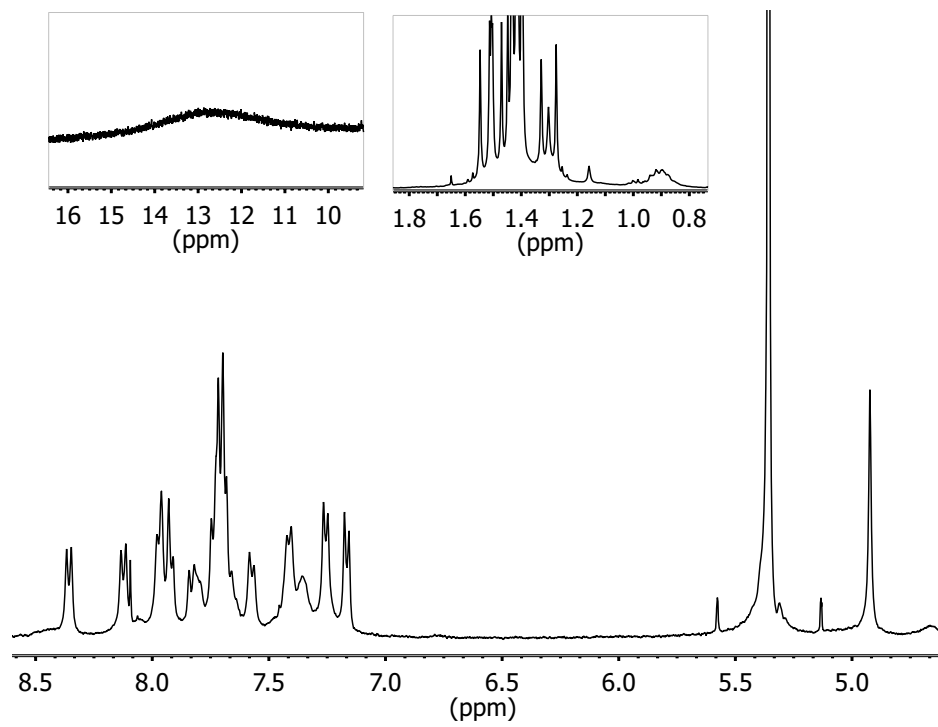

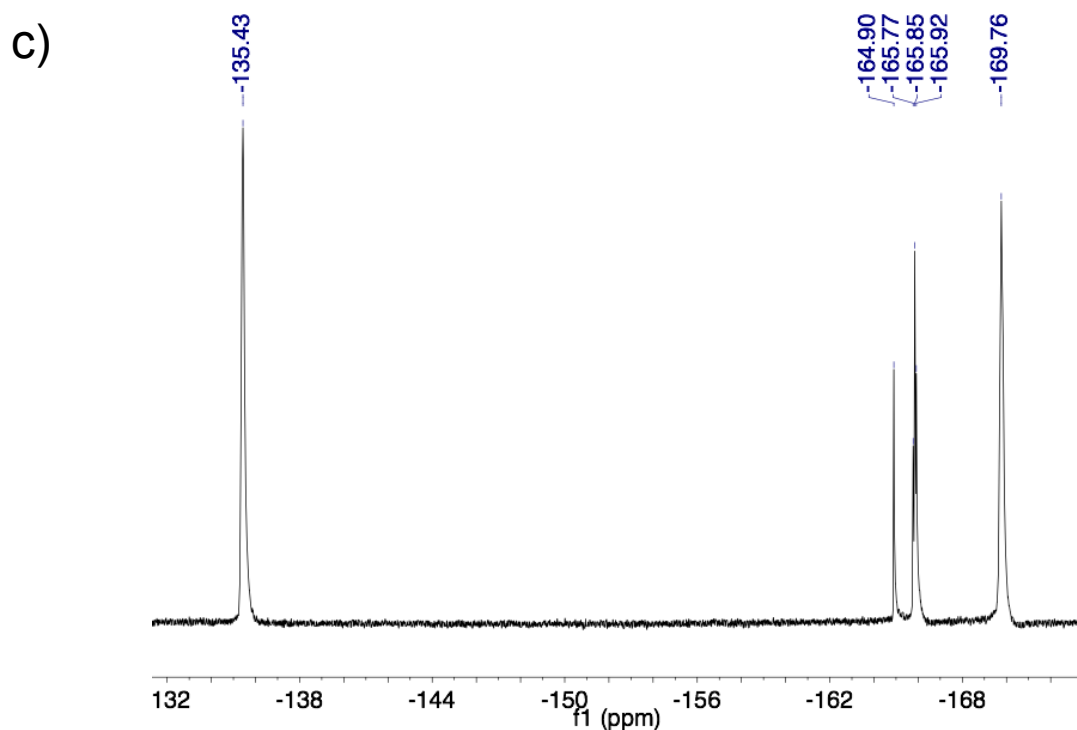

**Figure S5.** a)  $^1\text{H}$  NMR spectrum of in situ generated  $[\text{Re}^{\text{V}}(\text{O})(N\text{-MeTBP}_8\text{Cz})(\text{H})]^{2+}[\text{BArF}]_2^-$  (**2**) from  $[\text{Re}^{\text{V}}(\text{O})(N\text{-MeTBP}_8\text{Cz})]^+[\text{BArF}]^-$  and  $\text{HBarF}$  in  $\text{CD}_2\text{Cl}_2$ . Note: Large peaks at  $\sim 4$  ppm and  $\sim 1.4$  ppm are associated with the  $\text{Et}_2\text{O}$  proton resonances in  $\text{HBarF}\cdot 2\text{Et}_2\text{O}$ . b) Expansions of selected NMR regions c)  $^{19}\text{F}$  NMR spectrum of **2** in  $\text{CD}_2\text{Cl}_2$ . Chemical shifts were calibrated versus the standard  $\text{C}_6\text{F}_6$  at  $-164.9$  ppm and the remaining resonances ( $-135$ ,  $-165$ , and  $-169$  ppm) represent the three distinctive F-atoms of  $[\text{B}(\text{C}_6\text{F}_5)_4]^-$ .

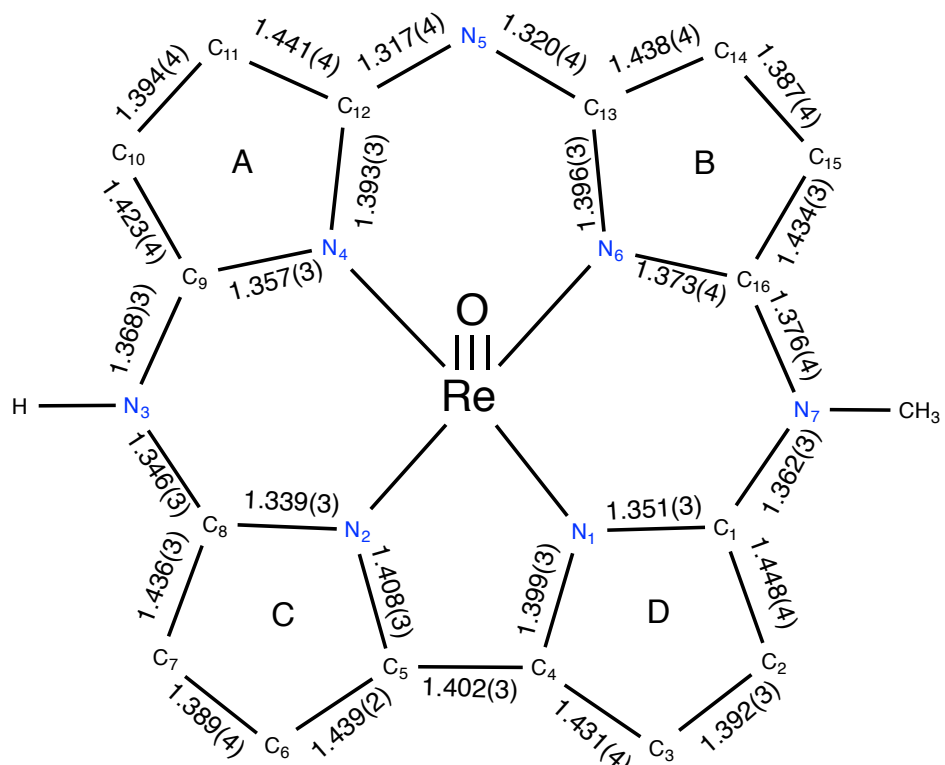

**Figure S6.** Bond lengths for the macrocyclic core of  $[\text{Re}^{\text{V}}(\text{O})(N\text{-MeTBP}_8\text{Cz})(\text{H})]^{2+}[\text{BArF}]_2^-$  (**2**) determined by X-ray crystallography.

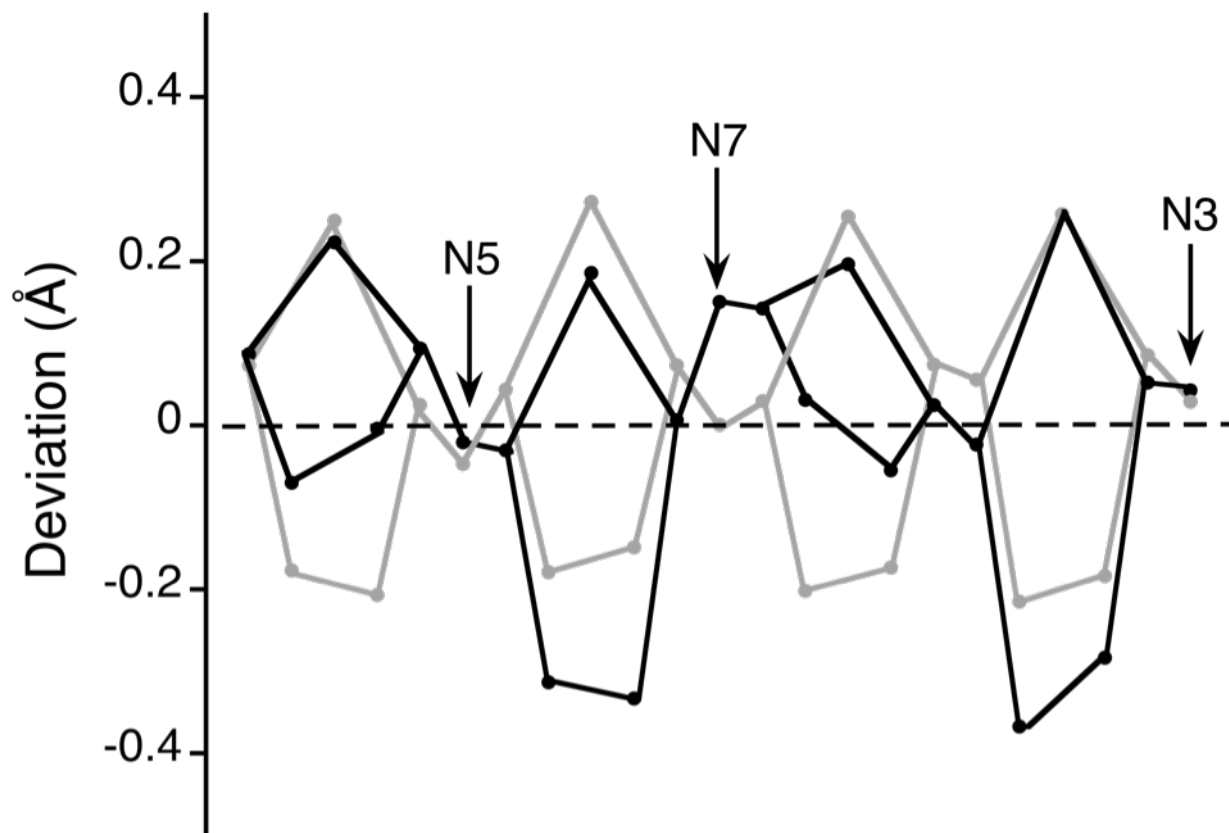

**Figure S7.** Linear display of deviations (Å) of the macrocycle atoms from the least-squares plane of the 23 atom core for  $[\text{Re}^{\text{V}}(\text{O})(N\text{-MeTBP}_8\text{Cz})(\text{H})]^{2+}[\text{BARF}]_2^-$  (**2**) (black) and  $\text{Re}^{\text{V}}(\text{O})(\text{TBP}_8\text{Cz})$  (grey).

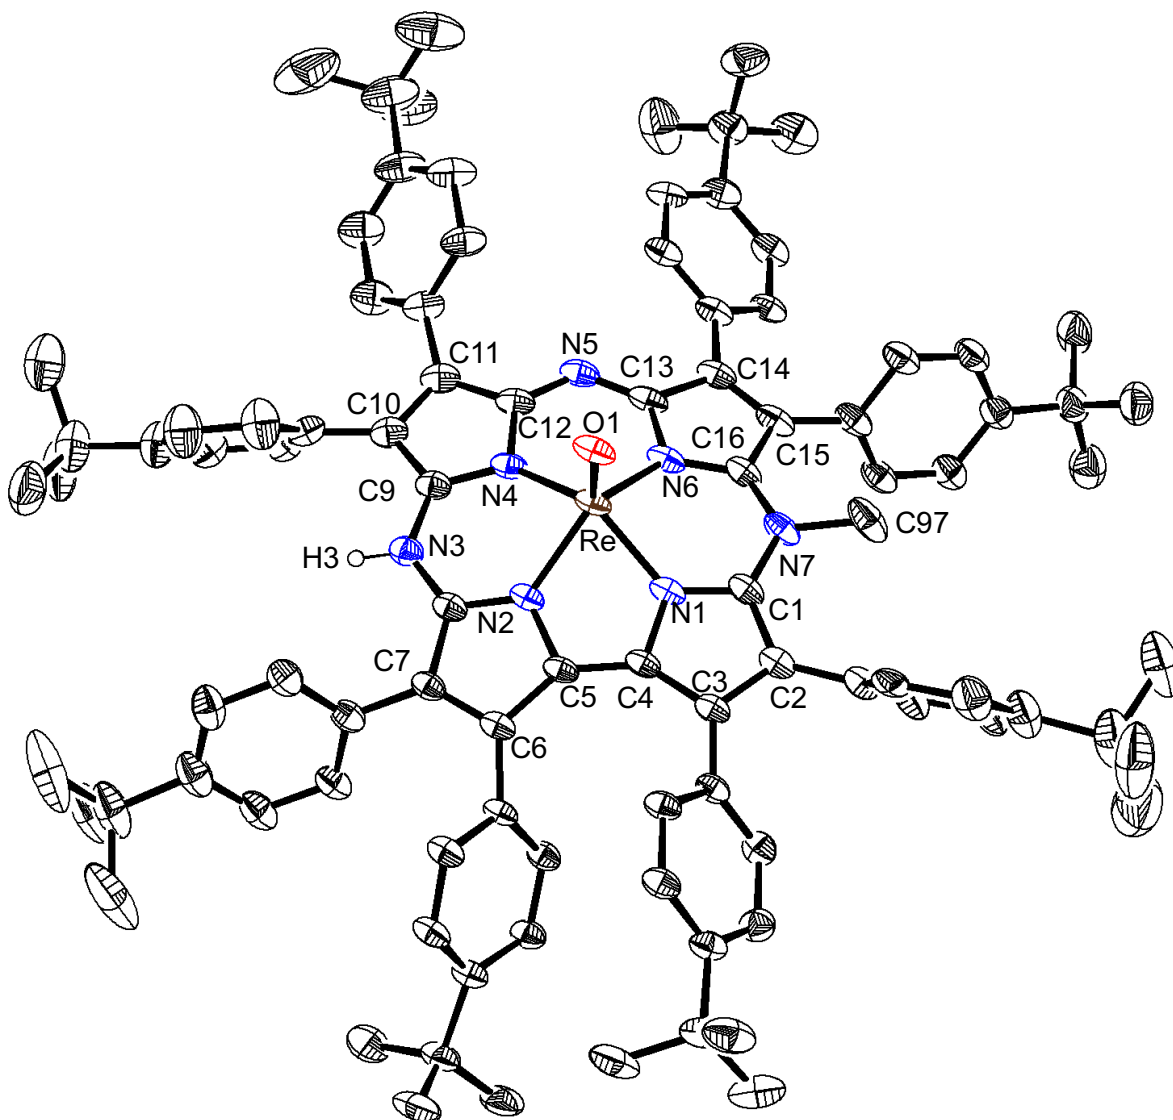

**Figure S8.** Displacement ellipsoid plot (40% probability level) at 110(2) K of the cation of  $[\text{Re}^{\text{V}}(\text{O})(N\text{-MeTBP}_8\text{Cz})(\text{H})]^{2+}[\text{BArF}]_2^-$  (**2**) with selected atoms labeled. H atoms, except for H3, and disorder were omitted for clarity.

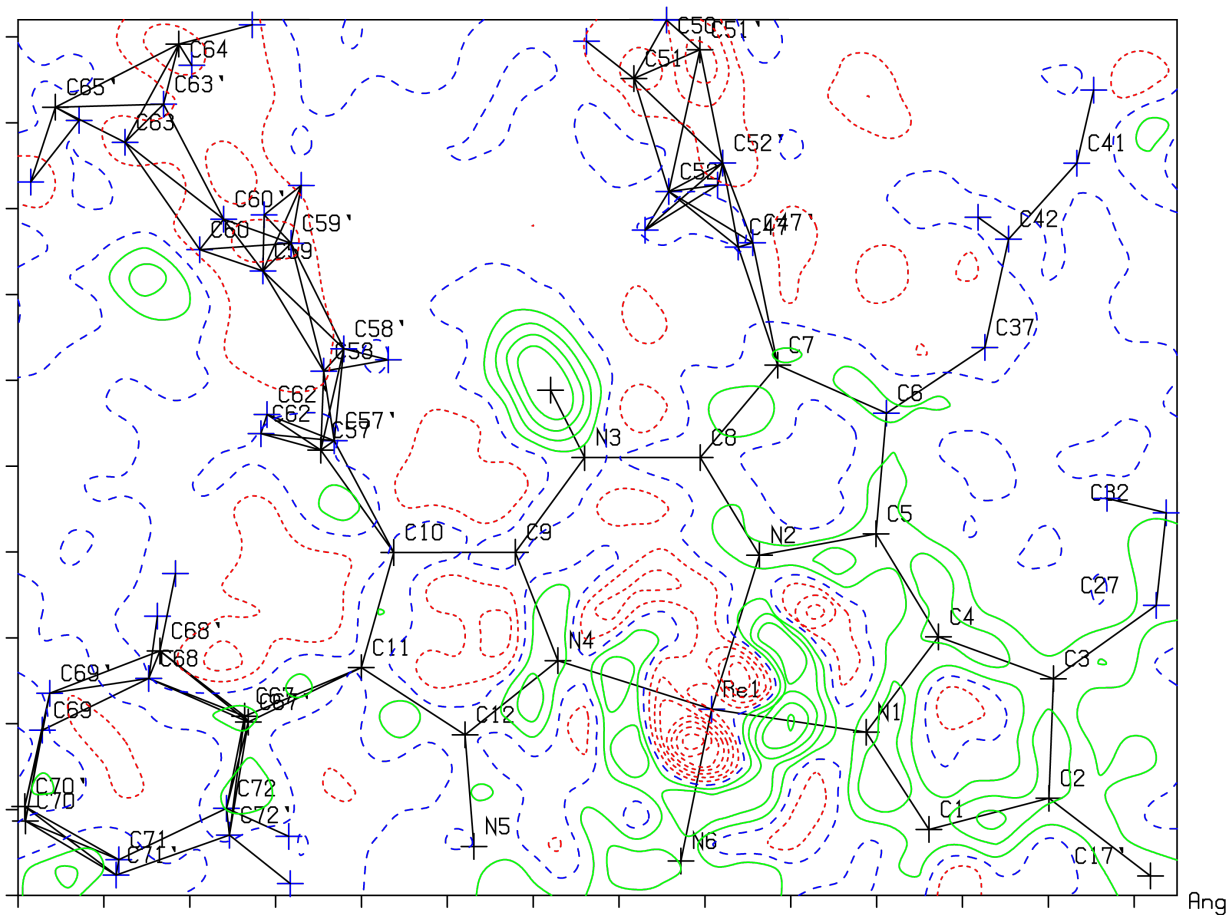

**Figure S9.** Contoured difference Fourier map drawn in the plane C8–N3–C9 showing the H atom attached to N3 in  $[\text{Re}^{\text{V}}(\text{O})(N\text{-MeTBP}_8\text{Cz})(\text{H})]^{2+}[\text{BArF}]_2$  (**2**).

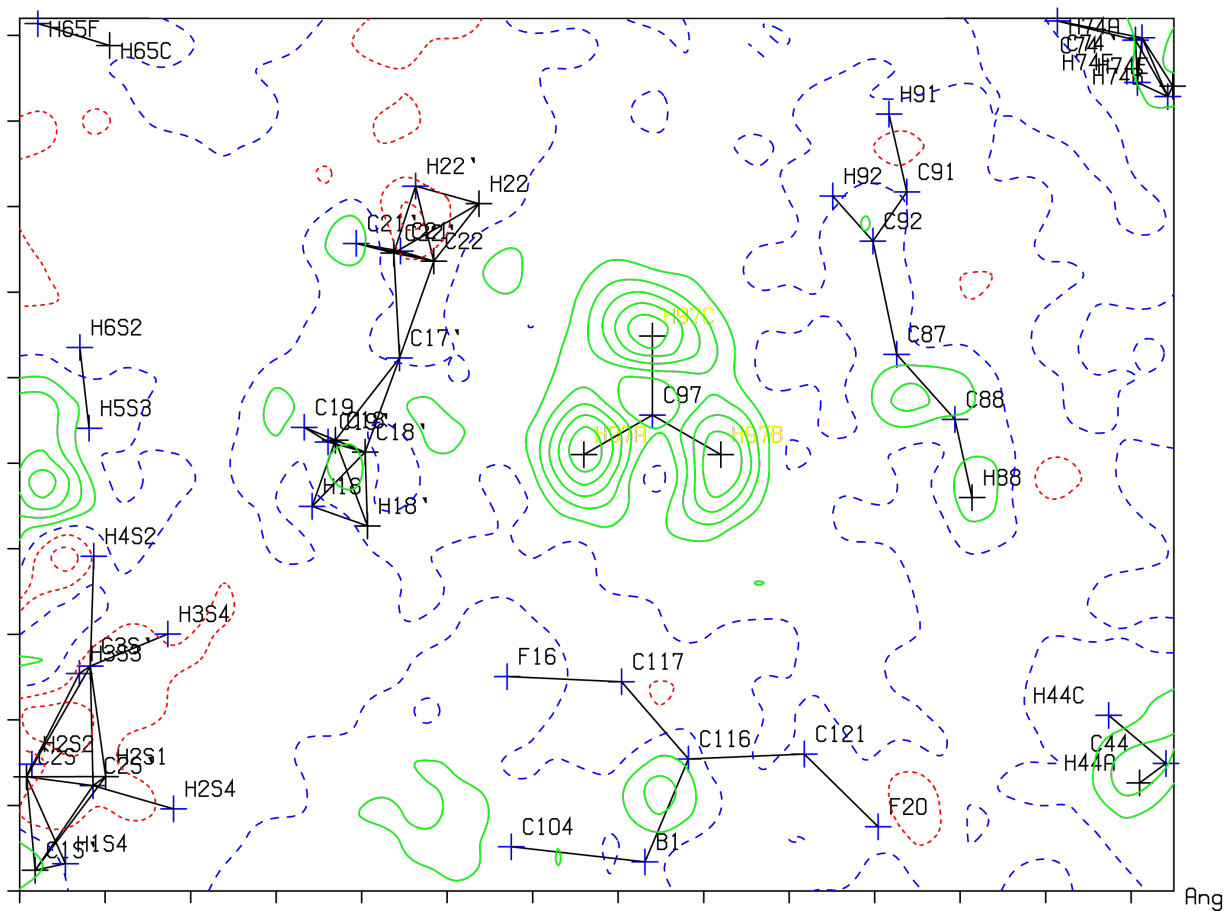

**Figure S10.** Contoured difference Fourier map showing the three H atoms attached to C97 in  $[\text{Re}^{\text{V}}(\text{O})(N\text{-MeTBP}_8\text{Cz})(\text{H})]^{2+}[\text{BArF}]_2$  (**2**).

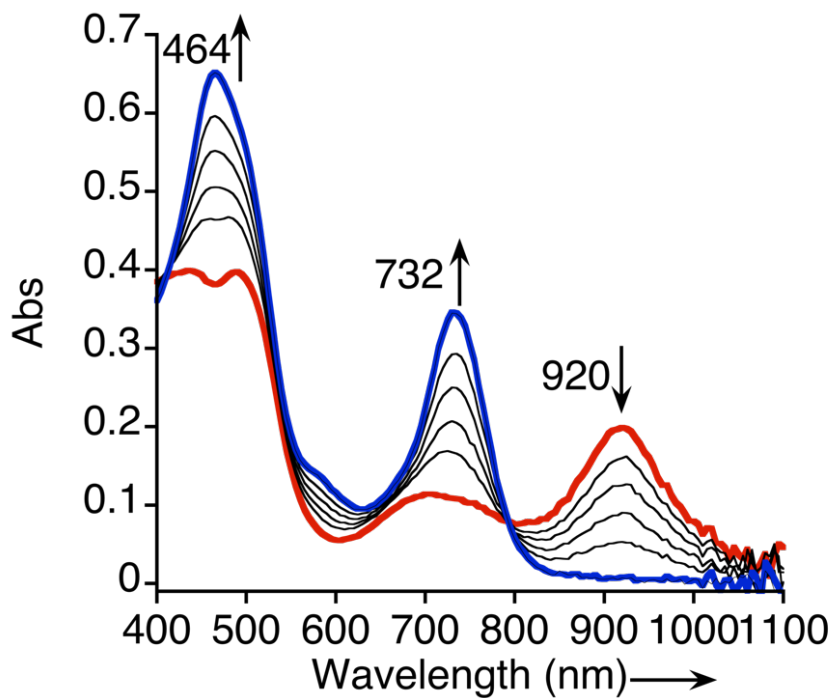

**Figure S11.** UV-vis spectral titration of  $[\text{Re}^{\text{V}}(\text{O})(\text{N-MeTBP}_8\text{Cz})]^+$  (**3**) +  $[(\text{C}_5\text{H}_5)_2\text{Fe}][\text{PF}_6]$  (0 – 1 equiv) in  $\text{CH}_2\text{Cl}_2$ .

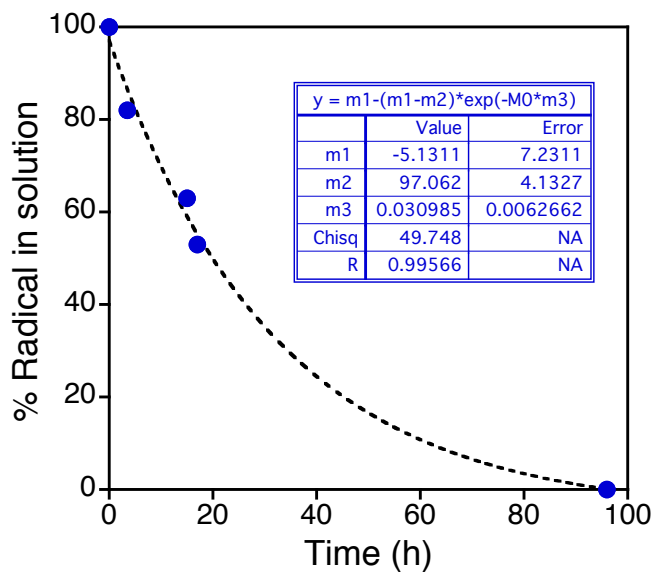

**Figure S12.** Stability of solid radical **3** in air. Concentration of **3** was obtained from UV-vis measurements, after dissolving the solid in dry  $\text{CH}_2\text{Cl}_2$ .



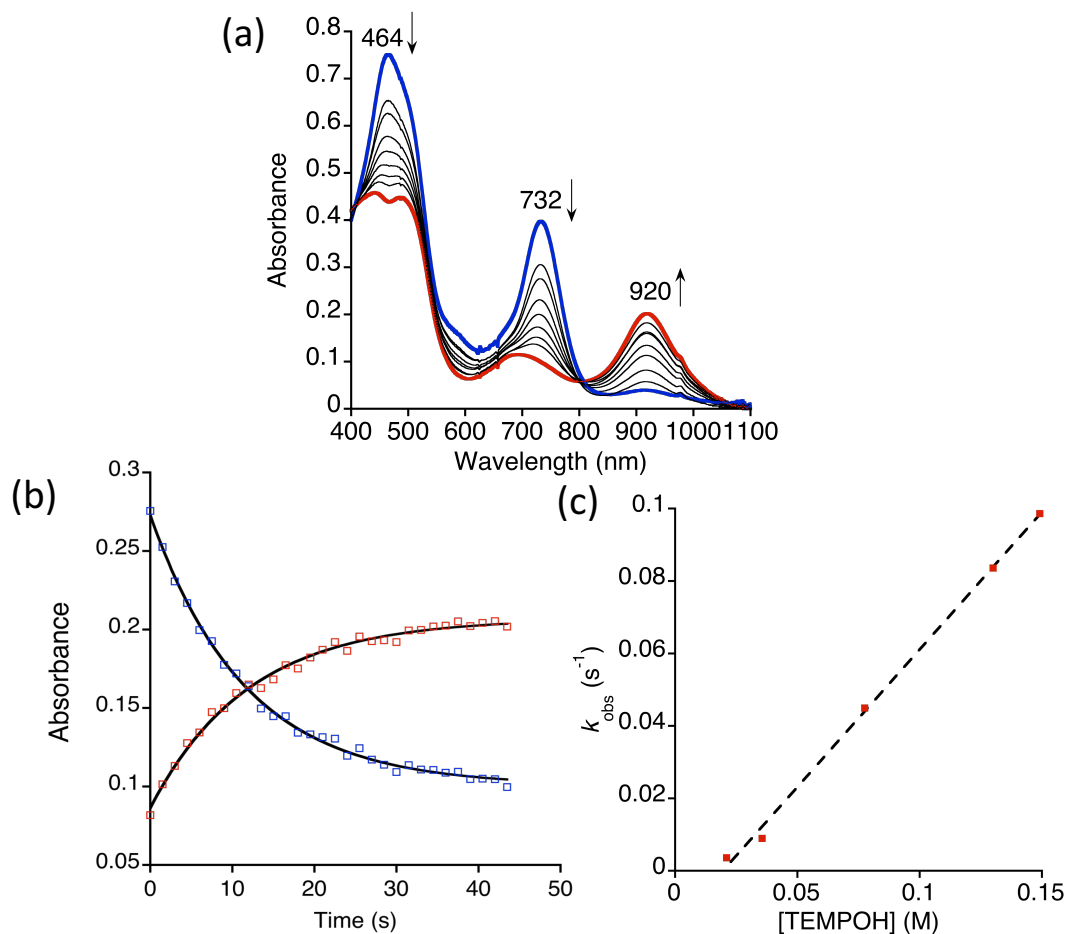

**Figure S13.** a) Time-resolved UV-vis spectral changes observed for the reaction of  $[\text{Re}^{\text{V}}(\text{O})(\text{N-MeTBP}_8\text{Cz})]^+[\text{OTf}]^-$  (1) (16  $\mu\text{M}$ ) with TEMPOH (0.13 M) in  $\text{CH}_2\text{Cl}_2$  at 25  $^\circ\text{C}$ . b) Plot of the change in absorbance vs time for the growth of  $[\text{Re}^{\text{V}}(\text{O})(\text{N-MeTBP}_8\text{Cz})]^\bullet$  (red squares) and decay of  $[\text{Re}^{\text{V}}(\text{O})(\text{N-MeTBP}_8\text{Cz})]^+[\text{OTf}]^-$  (1) (blue circles) with the best fit lines (black). c) Plot of pseudo-first-order rate constants ( $k_{\text{obs}}$ ) vs [TEMPOH] ( $R^2 = 0.99$ ). Slope:  $k_2 = 0.76(2) \text{ M}^{-1} \text{ s}^{-1}$ .

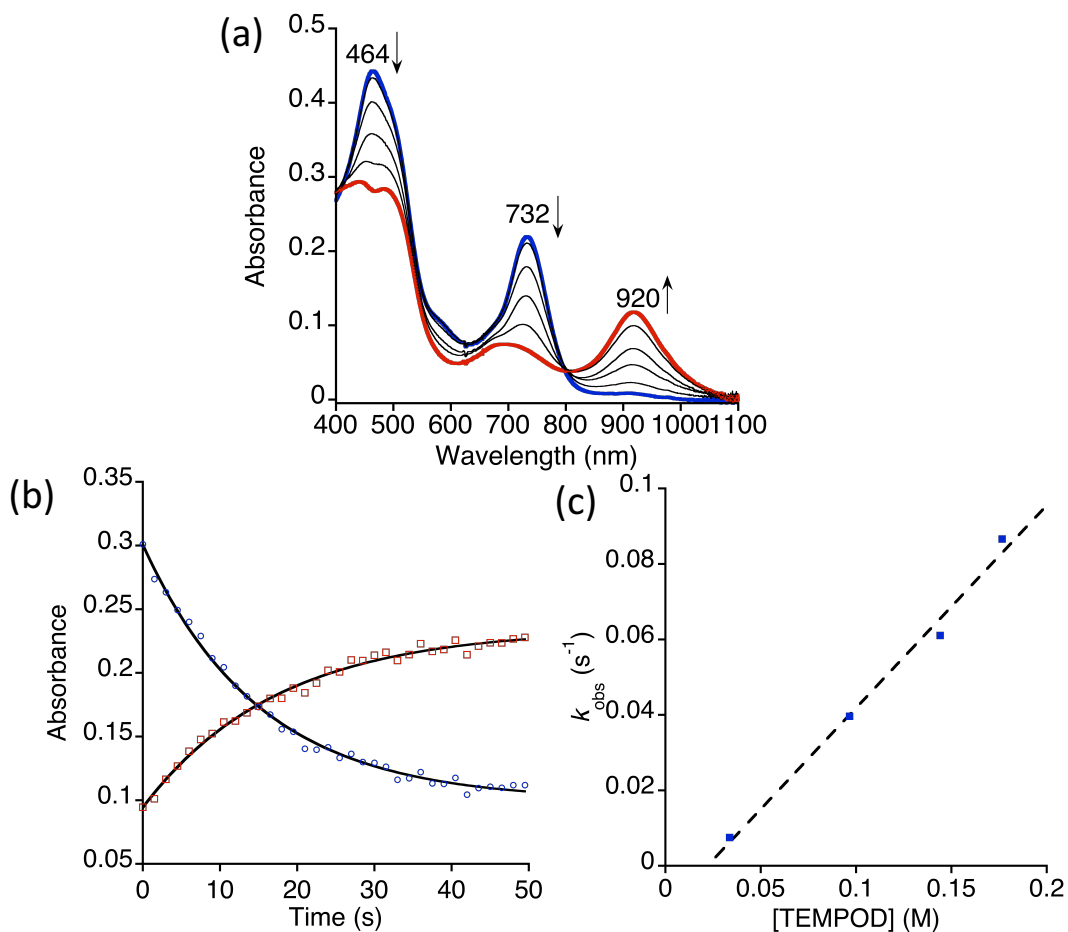

**Figure S14.** a) Time-resolved UV-vis spectral changes observed for the reaction of  $[\text{Re}^{\text{V}}(\text{O})(\text{N-MeTBP}_8\text{Cz})]^+[\text{OTf}]^-$  (1) (13  $\mu\text{M}$ ) with TEMPO (0.14 M) in  $\text{CH}_2\text{Cl}_2$  at 25  $^\circ\text{C}$ . b) Plot of the change in absorbance vs time for the growth of  $[\text{Re}^{\text{V}}(\text{O})(\text{N-MeTBP}_8\text{Cz})]^\bullet$  (red squares) and decay of  $[\text{Re}^{\text{V}}(\text{O})(\text{N-MeTBP}_8\text{Cz})]^+[\text{OTf}]^-$  (1) (blue circles) with the best fit lines (black). c) Plot of pseudo-first-order rate constants ( $k_{\text{obs}}$ ) vs [TEMPO] ( $R^2 = 0.99$ ). Slope:  $k_2 = 0.54(4) \text{ M}^{-1} \text{ s}^{-1}$ .

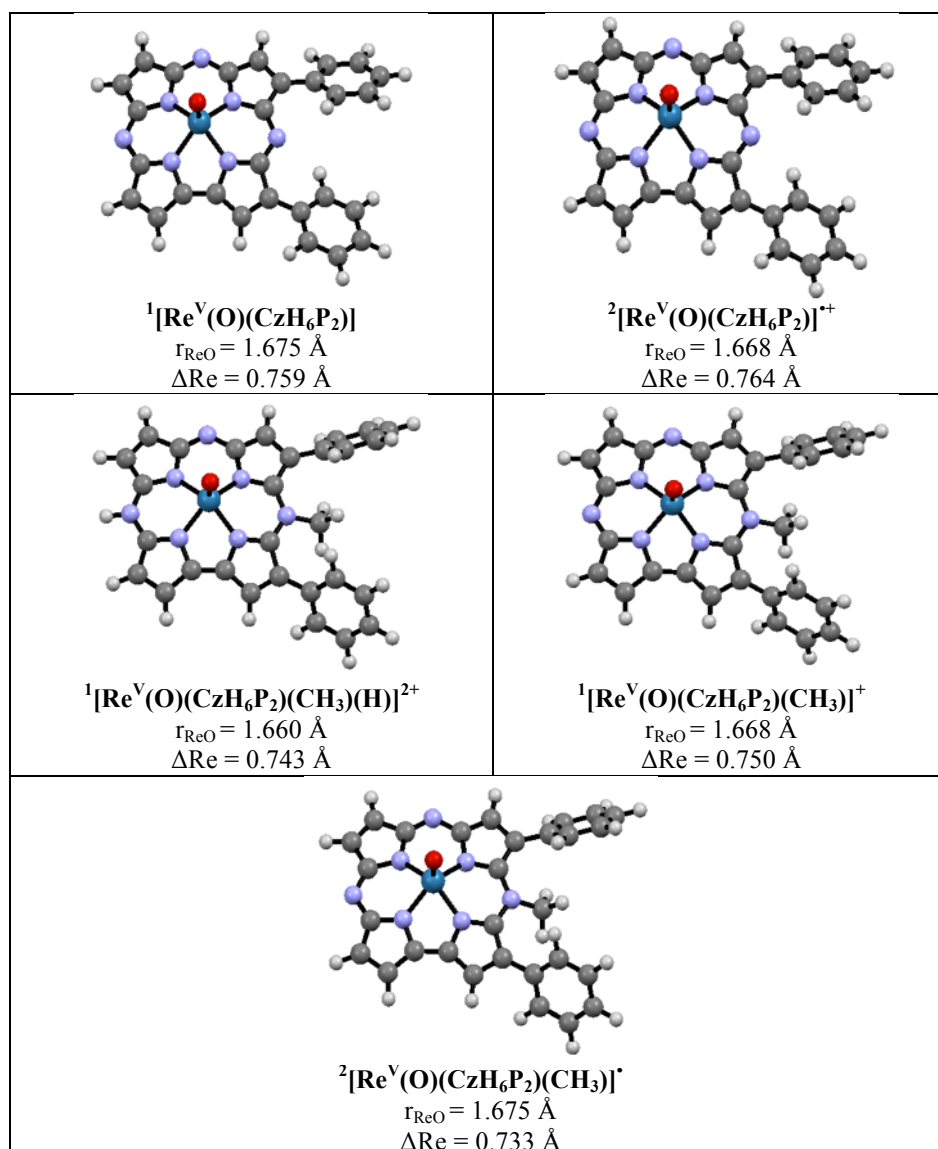

**Figure S15.** Optimized geometries for singlet ( $S = 0$ )  $^1[\text{Re}^{\text{V}}(\text{O})(\text{CzH}_6\text{P}_2)]$ ,  $^1[\text{Re}^{\text{V}}(\text{O})(\text{CzH}_6\text{P}_2)(\text{CH}_3)(\text{H})]^{2+}$ , and  $^1[\text{Re}^{\text{V}}(\text{O})(\text{CzH}_6\text{P}_2)(\text{CH}_3)]^+$ ; and doublet ( $S = 1/2$ )  $^2[\text{Re}^{\text{V}}(\text{O})(\text{CzH}_6\text{P}_2)]^+$  and  $^2[\text{Re}^{\text{V}}(\text{O})(\text{CzH}_6\text{P}_2)(\text{CH}_3)]^{\cdot}$ . Re–O bond distance ( $r_{\text{ReO}}$ ) and Re–Cz out-of-plane displacement (plane defined by the four internal nitrogens) ( $\Delta\text{Re}$ ) are shown in angstroms.

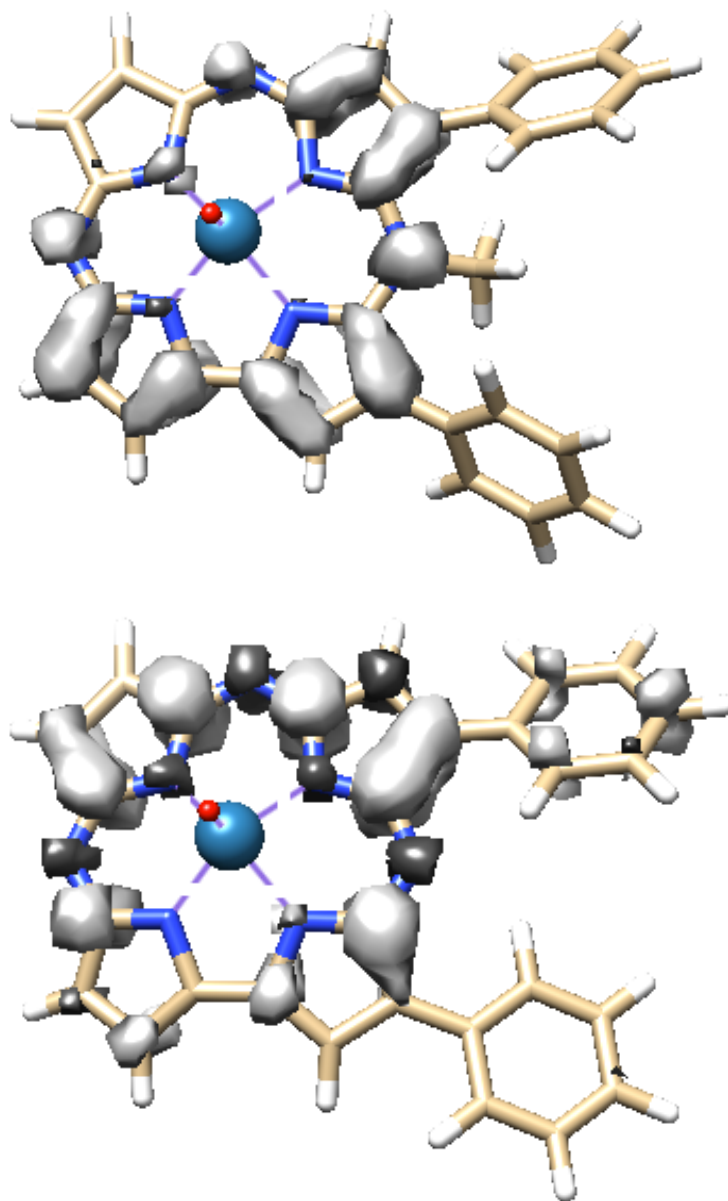

**Figure S16.** Spin density plot for  $^2[\text{Re}^{\text{V}}(\text{O})(\text{CzH}_6\text{P}_2)(\text{CH}_3)]^\bullet$  (top) and  $^2[\text{Re}^{\text{V}}(\text{O})(\text{CzH}_6\text{P}_2)]^{2+}$  (bottom) at the PBE0/SDD/6-31G\*\* level of theory. Positive (grey) and negative (black) spin densities are shown at the isodensity level of 0.002 electron/bohr.

Cartesian Coordinates of Optimized Geometries reported:

<sup>1</sup>[Re<sup>V</sup>(O)(C<sub>2</sub>H<sub>6</sub>P<sub>2</sub>)]

|    |                   |                   |                   |
|----|-------------------|-------------------|-------------------|
| Re | 0.00818794032515  | 0.14933948138561  | -0.04790964681023 |
| O  | 1.52858575437192  | 0.68049749672875  | 0.41257645127756  |
| N  | -1.27738488166067 | 0.08869802972508  | 1.45737135237072  |
| C  | -1.52499725166527 | -0.88732182443656 | 2.38136362726643  |
| C  | -2.45404279805976 | -0.34161280847188 | 3.34553654925142  |
| C  | -2.79636610410977 | 0.93349059629091  | 2.89056306608684  |
| C  | -2.08611439097749 | 1.18414564562655  | 1.69794477279927  |
| C  | -2.07358115415102 | 2.08148004659300  | 0.60959669950914  |
| C  | -2.75809670161129 | 3.22486805790541  | 0.12601251565268  |
| C  | -2.37319308995706 | 3.41221989595501  | -1.19126440725460 |
| C  | -1.46366829332784 | 2.36865932603690  | -1.54125113269089 |
| N  | -1.25777392826445 | 1.62689159067230  | -0.40960083820195 |
| N  | -0.98933074760538 | 2.05530446984394  | -2.74654846762225 |
| C  | -0.39305656979028 | 0.89321244679940  | -2.95497816930338 |
| C  | -0.02827355431124 | 0.38582428416594  | -4.24925590754690 |
| C  | 0.39725502307911  | -0.90265906521274 | -4.09707599629458 |
| C  | 0.31168612989959  | -1.23143061616071 | -2.70241732054572 |
| N  | -0.12010245245282 | -0.10538834855346 | -2.02223448996187 |
| N  | 0.54000724883625  | -2.42815642707173 | -2.18825197098915 |
| C  | 0.28043127263327  | -2.71859088802873 | -0.91900343926388 |
| C  | 0.34329811051377  | -4.02014402715751 | -0.34663668349761 |
| C  | -0.08786873528290 | -3.95052837604014 | 0.96111673020228  |
| C  | -0.43805701021736 | -2.56476187794952 | 1.20729060256836  |
| N  | -0.15056839419412 | -1.83677820950067 | 0.05837052756298  |
| N  | -1.05618695675244 | -2.12672977183169 | 2.29322623865391  |
| C  | -0.23436453609087 | -5.05997712961293 | 1.90350525311503  |
| C  | -0.12552416268421 | -4.86865929275918 | 3.28962709720429  |
| C  | -0.24332884248781 | -5.94536802864032 | 4.16116670713341  |
| C  | -0.46969563027753 | -7.22899300604114 | 3.67051790870708  |
| C  | -0.58157656903525 | -7.43081882828886 | 2.29638284730425  |
| C  | -0.46645062392481 | -6.35785487898264 | 1.42256057205181  |
| H  | -0.58147067968841 | -6.51857760855959 | 0.35413406220215  |
| H  | -0.76788066475884 | -8.42665363830893 | 1.90462721892228  |
| H  | -0.56039874731100 | -8.06805318947221 | 4.35431969022270  |
| H  | -0.14955967826140 | -5.77950602568436 | 5.23085126749201  |
| H  | 0.05360229894931  | -3.87221570383563 | 3.67650017072995  |
| H  | 0.68019978035992  | -4.89334763274999 | -0.88741070624073 |
| H  | 0.71432920322494  | -1.60166902791144 | -4.85839227226291 |
| H  | -0.13988645255862 | 0.95356344998140  | -5.16271818508009 |
| H  | -2.72389987021584 | 4.17278312823310  | -1.87510866924258 |
| H  | -3.47666809785601 | 3.81434592525784  | 0.67920720860829  |
| H  | -3.53228250053194 | 1.59058899401795  | 3.33416187473132  |
| C  | -2.96762580230485 | -0.99682659549805 | 4.54774307002383  |
| C  | -3.00433200113105 | -2.39515044672352 | 4.66991941243495  |
| C  | -3.51395937245491 | -2.98752846881396 | 5.81941066198837  |
| C  | -3.99630534267331 | -2.20446617443350 | 6.86521222144983  |
| C  | -3.95966613863239 | -0.81561623895921 | 6.75767294028094  |

|   |                   |                   |                  |
|---|-------------------|-------------------|------------------|
| C | -3.44881154133012 | -0.21864999015659 | 5.61288970635664 |
| H | -3.39522126784415 | 0.86493822429164  | 5.55158716569948 |
| H | -4.32166523846267 | -0.19537831977669 | 7.57268234495630 |
| H | -4.39434917018266 | -2.67203470579832 | 7.76130942412074 |
| H | -3.53730808391975 | -4.07129837866660 | 5.89420340198243 |
| H | -2.62913653318367 | -3.00861331942170 | 3.85865968188964 |

$^2[\text{Re}^{\text{V}}(\text{O})(\text{C}_2\text{H}_6\text{P}_2)]^{++}$

|    |                   |                   |                   |
|----|-------------------|-------------------|-------------------|
| Re | 0.05582048077707  | 0.14735595613116  | -0.03849532040224 |
| O  | 1.58917715966788  | 0.64423231981343  | 0.38922743295544  |
| N  | -1.20560965002020 | 0.11042949615581  | 1.49314375285815  |
| C  | -1.49499205543218 | -0.86467178843434 | 2.38120767589621  |
| C  | -2.44722785769607 | -0.31550270649689 | 3.35527305707848  |
| C  | -2.75842030741891 | 0.96361797024429  | 2.91436205094144  |
| C  | -2.02409566627487 | 1.21966556305329  | 1.73122064566324  |
| C  | -2.00918586684192 | 2.10461855534868  | 0.65504009644148  |
| C  | -2.72959579726861 | 3.23234398605549  | 0.15941209141123  |
| C  | -2.37557235990163 | 3.39820606155237  | -1.16049780795703 |
| C  | -1.44330013698708 | 2.36010231626647  | -1.50367676364889 |
| N  | -1.18824248996364 | 1.65145876557690  | -0.37568402186429 |
| N  | -0.98617512203961 | 2.04399675144083  | -2.72501306020439 |
| C  | -0.40787391958303 | 0.88573740838376  | -2.93758891938256 |
| C  | -0.06279259751068 | 0.36963931341084  | -4.25314270930964 |
| C  | 0.34104962415356  | -0.91559500335908 | -4.10808419454840 |
| C  | 0.26646059252102  | -1.24472056136962 | -2.69796558657551 |
| N  | -0.12765587518716 | -0.11263032518722 | -2.00722658751025 |
| N  | 0.47584850494324  | -2.44634957299992 | -2.19811544305953 |
| C  | 0.23237860797994  | -2.73743586640064 | -0.92350264415167 |
| C  | 0.27206993098574  | -4.04508223227493 | -0.36683422842084 |
| C  | -0.11444422249521 | -3.97628865120924 | 0.95242748683842  |
| C  | -0.43781722868396 | -2.55713960555689 | 1.20984435452577  |
| N  | -0.14363868936090 | -1.83616118901404 | 0.06779729743996  |
| N  | -1.04214076142664 | -2.11771107653077 | 2.29501127381328  |
| C  | -0.24262259141408 | -5.06590940357155 | 1.89961838858036  |
| C  | -0.16077780411649 | -4.85152476357990 | 3.28941064015977  |
| C  | -0.23773080531063 | -5.92320859993835 | 4.16705221130673  |
| C  | -0.40731733848212 | -7.21916780964448 | 3.68129461396899  |
| C  | -0.49707160884059 | -7.44447234878174 | 2.30627109076525  |
| C  | -0.41128062907589 | -6.38127825717532 | 1.42356540795498  |
| H  | -0.50416885370812 | -6.56005210304950 | 0.35644708783262  |
| H  | -0.63856433660930 | -8.45164495061854 | 1.92739413475363  |
| H  | -0.46952778326543 | -8.05468785510525 | 4.37195118232204  |
| H  | -0.15571283409825 | -5.74916367933715 | 5.23563624842416  |
| H  | -0.01955456596068 | -3.84758105008963 | 3.67136943021474  |
| H  | 0.57608243323614  | -4.91718724542019 | -0.92749570423094 |
| H  | 0.63578578795474  | -1.62375965528625 | -4.87006595794586 |
| H  | -0.17602863368623 | 0.94511529753345  | -5.16180854155922 |
| H  | -2.74780078845510 | 4.13805562272753  | -1.85559856158480 |
| H  | -3.44752456374936 | 3.81905009821508  | 0.71632415684143  |
| H  | -3.48965396631896 | 1.62883342266541  | 3.35249196077192  |

|   |                   |                   |                  |
|---|-------------------|-------------------|------------------|
| C | -2.97145230869588 | -0.98244526886479 | 4.53561380028535 |
| C | -3.01563148325904 | -2.38484623566847 | 4.63859749858128 |
| C | -3.55518496663526 | -2.98515106293629 | 5.76792183854816 |
| C | -4.04868913043622 | -2.20637559386926 | 6.81279712952382 |
| C | -4.00006188415055 | -0.81432760651855 | 6.72704635833684 |
| C | -3.46830787085444 | -0.20764652180115 | 5.60052034103141 |
| H | -3.40575185720016 | 0.87588211128011  | 5.55551147014327 |
| H | -4.37040042828677 | -0.20457945611170 | 7.54513829189460 |
| H | -4.46629021117123 | -2.68088428456285 | 7.69572497969076 |
| H | -3.59500167299593 | -4.06845593955740 | 5.83133990729478 |
| H | -2.63623140135032 | -2.99521052553299 | 3.82755340726605 |

${}^1[\text{Re}^{\text{V}}(\text{O})(\text{C}_2\text{H}_6\text{P}_2)(\text{CH}_3)]^+$

|    |                   |                   |                   |
|----|-------------------|-------------------|-------------------|
| Re | 0.05819682785620  | 0.03729005126461  | -0.23259303614260 |
| O  | 1.61743451009652  | 0.37896788998590  | 0.25045704160878  |
| N  | -1.24306292657343 | 0.03726143655734  | 1.27206681929780  |
| C  | -1.60065832632186 | -0.90105512873700 | 2.18233112428428  |
| C  | -2.43860798307039 | -0.26774439097097 | 3.17732531577186  |
| C  | -2.63869401911820 | 1.03594430949118  | 2.73731084919309  |
| C  | -1.91825884698397 | 1.22186455839315  | 1.54215434729060  |
| C  | -1.79384370239085 | 2.15264925965753  | 0.50153151350703  |
| C  | -2.34476217871936 | 3.39764822006985  | 0.07846138650236  |
| C  | -1.93232972721524 | 3.60581954416077  | -1.21887469411426 |
| C  | -1.13949962101422 | 2.47651159481905  | -1.62442991743460 |
| N  | -1.02454002949589 | 1.66030436067623  | -0.53299569601397 |
| N  | -0.70255195027566 | 2.17722211701922  | -2.83833099168019 |
| C  | -0.22785541706810 | 0.96741338933658  | -3.10386464992740 |
| C  | 0.07824082868017  | 0.48792690509051  | -4.42397337626810 |
| C  | 0.37027966769818  | -0.84267097640528 | -4.33307108253739 |
| C  | 0.25663561132183  | -1.21854702959659 | -2.95259171196247 |
| N  | -0.05967512844331 | -0.08768622070557 | -2.21739838131117 |
| N  | 0.37863957720356  | -2.44261803155625 | -2.48029610580692 |
| C  | 0.10360485520455  | -2.77714675731456 | -1.22863603401781 |
| C  | 0.16165496706032  | -4.09105915957819 | -0.70461883678414 |
| C  | -0.23686820001849 | -4.06851736799979 | 0.61659293438063  |
| C  | -0.60451691385380 | -2.69977441988485 | 0.89376624071290  |
| N  | -0.31639365230149 | -1.92623714774884 | -0.20885853313713 |
| N  | -1.26508094595157 | -2.21314133472837 | 1.99529269919876  |
| C  | -1.82061010321633 | -3.19096653707223 | 2.95036763794060  |
| H  | -1.12541076298055 | -3.37360763442008 | 3.76989988169881  |
| H  | -2.75232883158924 | -2.79679536215636 | 3.34470164209512  |
| H  | -2.01938306879759 | -4.12188489693690 | 2.42897721911077  |
| C  | -0.17945008565982 | -5.25022106802863 | 1.49783429337054  |
| C  | 0.61133354365189  | -5.24258204355694 | 2.65493807708812  |
| C  | 0.71764771497183  | -6.38621250745443 | 3.43774830680643  |
| C  | 0.03892065277799  | -7.54864135119723 | 3.07541758309558  |
| C  | -0.73977337009454 | -7.56702769339408 | 1.92159594000920  |
| C  | -0.84614385416301 | -6.42580853888261 | 1.13212005336631  |
| H  | -1.45440287228897 | -6.43840765788917 | 0.23188267900356  |
| H  | -1.26402563202877 | -8.47235578631483 | 1.63196581648667  |

|   |                   |                   |                   |
|---|-------------------|-------------------|-------------------|
| H | 0.12490808642370  | -8.44094151284556 | 3.68791490113139  |
| H | 1.34202000962687  | -6.37526082918344 | 4.32603151938305  |
| H | 1.16758207554844  | -4.34741595575564 | 2.92247205063444  |
| H | 0.50970647428668  | -4.95414171447461 | -1.25505526537093 |
| H | 0.61554044369976  | -1.53437427392913 | -5.12702446381165 |
| H | 0.02517231185831  | 1.10656036096853  | -5.30927132409860 |
| H | -2.18365444625446 | 4.43655580926574  | -1.86400041153545 |
| H | -2.99064365404457 | 4.03732943529937  | 0.66429322924262  |
| H | -3.23594740135392 | 1.77591215823509  | 3.25254562885379  |
| C | -2.98444203069907 | -0.77264948612395 | 4.45193588794164  |
| C | -2.13183073281700 | -1.19016011778897 | 5.48332031307430  |
| C | -2.65709766970784 | -1.59320515719415 | 6.70536829384283  |
| C | -4.03563424196954 | -1.58566022575087 | 6.91200485762937  |
| C | -4.88836443222045 | -1.16496193164391 | 5.89512450552772  |
| C | -4.36747038620443 | -0.75449243150719 | 4.67154031543304  |
| H | -5.03217733786591 | -0.43003914410734 | 3.87565735959386  |
| H | -5.96259829385722 | -1.15378527109714 | 6.05344377185909  |
| H | -4.44312283048226 | -1.90198034330724 | 7.86713841786608  |
| H | -1.98882168087646 | -1.90298138370360 | 7.50295383336232  |
| H | -1.05508263997900 | -1.17070808934819 | 5.33430875475945  |

$^1[\text{Re}^{\text{V}}(\text{O})(\text{CzH}_6\text{P}_2)(\text{CH}_3)(\text{H})]^{2+}$

|    |                   |                    |                   |
|----|-------------------|--------------------|-------------------|
| Re | -0.05284767723941 | -0.00510976932194  | 0.00968060632378  |
| O  | 1.47863038363323  | 0.36271338843346   | 0.53505469496837  |
| N  | -1.38321253104360 | -0.03353290863358  | 1.48070973083156  |
| C  | -1.72263326127197 | -0.97266535521512  | 2.39715460743587  |
| C  | -2.57471185240164 | -0.339583925556628 | 3.40316441728670  |
| C  | -2.81848404925367 | 0.94555301695350   | 2.93740104295231  |
| C  | -2.09885951248395 | 1.13449654205771   | 1.74074601251468  |
| C  | -1.97554194081760 | 2.07558609943723   | 0.71278241649466  |
| C  | -2.54109831664093 | 3.30769496758237   | 0.28684795231144  |
| C  | -2.09955745649987 | 3.54681500726514   | -1.00233666391517 |
| C  | -1.27612624616293 | 2.44342841846504   | -1.36413599991204 |
| N  | -1.16401462017436 | 1.60876780960010   | -0.31389845905420 |
| N  | -0.73782996009210 | 2.09732076254941   | -2.56167099643027 |
| C  | -0.23533432833682 | 0.88039141734760   | -2.88786732015500 |
| C  | 0.12715455716805  | 0.43595797322287   | -4.19322188931676 |
| C  | 0.43222804449583  | -0.89524713354113  | -4.08146431752848 |
| C  | 0.26130512143523  | -1.27284743562070  | -2.70872503160402 |
| N  | -0.10984892649458 | -0.13637614547153  | -1.98916580348246 |
| N  | 0.37151229503907  | -2.48519910628491  | -2.22057993484133 |
| C  | 0.06387040132970  | -2.82654367116477  | -0.97815582203414 |
| C  | 0.10485674355779  | -4.14276570373382  | -0.46485565004640 |
| C  | -0.31375331083708 | -4.12674340258739  | 0.85259441423835  |
| C  | -0.68818770089247 | -2.75476908930316  | 1.12430204703872  |
| N  | -0.37258292074376 | -1.97280626544207  | 0.03573818594989  |
| N  | -1.38193927852726 | -2.27687505168080  | 2.21248542255046  |
| C  | -1.98411279527496 | -3.27680724751630  | 3.12773429756100  |
| H  | -1.29444965319921 | -3.53203841122386  | 3.93017104078556  |
| H  | -2.89638025859683 | -2.85765657808260  | 3.54073697630231  |



|   |                   |                   |                   |
|---|-------------------|-------------------|-------------------|
| H | -2.22187527101673 | -4.16959696898652 | 2.55607942632363  |
| C | -0.27315231513553 | -5.30406735041580 | 1.73116842382127  |
| C | 0.45600609813556  | -5.27521009150940 | 2.93019451740845  |
| C | 0.56495908207593  | -6.42240395419275 | 3.70540613895677  |
| C | -0.05612757882435 | -7.60368413717774 | 3.29835982732537  |
| C | -0.77510862395923 | -7.64074305953894 | 2.10593087382571  |
| C | -0.87735588312094 | -6.49966782803328 | 1.31737200883839  |
| H | -1.43770199582081 | -6.52864073856313 | 0.38698080329450  |
| H | -1.25263449089449 | -8.56107135962883 | 1.78569423810587  |
| H | 0.03063692898004  | -8.49835914714703 | 3.90699942390052  |
| H | 1.14820571626660  | -6.40235782206861 | 4.62061600575067  |
| H | 0.97599855844486  | -4.36791645005421 | 3.22922512293973  |
| H | 0.46083518765585  | -5.00385583897917 | -1.01431457099425 |
| H | 0.72539700163940  | -1.57734016281948 | -4.86832402315916 |
| H | 0.11770370461034  | 1.03914722105209  | -5.09210362932920 |
| H | -0.80590025538720 | 2.77319335747503  | -3.31550278253736 |
| H | -2.35915417337634 | 4.38755635730492  | -1.63221762673639 |
| H | -3.21666572582434 | 3.93301093915000  | 0.85523176352682  |
| H | -3.42204819742545 | 1.68404570119496  | 3.44779877700198  |
| C | -3.06804820247580 | -0.83346940508729 | 4.69138324669238  |
| C | -2.18376967094429 | -1.36624991593667 | 5.64515375928091  |
| C | -2.65052260042557 | -1.72553563493116 | 6.90174075836676  |
| C | -4.00157784569949 | -1.57231882933793 | 7.21687968376535  |
| C | -4.88470146896142 | -1.04403739680030 | 6.27699097859333  |
| C | -4.42177096657812 | -0.66342169166391 | 5.02329478410466  |
| H | -5.11197437927999 | -0.25818459118020 | 4.28849393425682  |
| H | -5.93521446582205 | -0.92562295494707 | 6.52229882516514  |
| H | -4.36385363702519 | -1.86006196103071 | 8.19863840180784  |
| H | -1.95968251520229 | -2.11330495319819 | 7.64358638444821  |
| H | -1.12483564428285 | -1.45429461547313 | 5.41586520802987  |

$^2[\text{Re}^{\text{V}}(\text{O})(\text{C}_2\text{H}_6\text{P}_2)(\text{CH}_3)]^+$

|    |                   |                   |                   |
|----|-------------------|-------------------|-------------------|
| Re | -0.01115156000908 | 0.01932484573487  | -0.24358716152847 |
| O  | 1.54358296882731  | 0.36755325471353  | 0.27299509578907  |
| N  | -1.32478488066647 | 0.01707449853178  | 1.24778328736326  |
| C  | -1.66810009314980 | -0.91997302824345 | 2.17047603611990  |
| C  | -2.46362690528249 | -0.29406587900001 | 3.16826880859151  |
| C  | -2.66290190758207 | 1.03784958020399  | 2.73264932710208  |
| C  | -1.97224515620875 | 1.21499136701374  | 1.54187038776409  |
| C  | -1.83498697405236 | 2.16071076326502  | 0.48467991961295  |
| C  | -2.35091902042957 | 3.39873906050020  | 0.06783893987312  |
| C  | -1.92300198193090 | 3.60588614794308  | -1.24692276714173 |
| C  | -1.16025692200583 | 2.48091859643407  | -1.64107923317431 |
| N  | -1.08020491179449 | 1.64936838097892  | -0.55297149174538 |
| N  | -0.68191645105158 | 2.17537338410831  | -2.86065332640666 |
| C  | -0.21892681811743 | 0.97245404521194  | -3.10945870055982 |
| C  | 0.14762509592858  | 0.49702871299758  | -4.42656305597069 |
| C  | 0.44516313082375  | -0.82494703357194 | -4.33710118930866 |
| C  | 0.28125979603391  | -1.22650529884143 | -2.95868965384767 |

|   |                   |                   |                   |
|---|-------------------|-------------------|-------------------|
| N | -0.07572771236005 | -0.09768483270086 | -2.22758762954755 |
| N | 0.41454783754591  | -2.44335063808084 | -2.50604922024205 |
| C | 0.11004618264414  | -2.79700261383661 | -1.24535242008320 |
| C | 0.18187660276970  | -4.09080782383950 | -0.72409521341779 |
| C | -0.25401674242626 | -4.06423042593844 | 0.60647624717742  |
| C | -0.64602002285727 | -2.72395784273407 | 0.86545847318053  |
| N | -0.36005788585520 | -1.94993579497985 | -0.23820748297903 |
| N | -1.34686856858404 | -2.24887918057041 | 1.96769589457666  |
| C | -2.08002297686934 | -3.23403827849447 | 2.76776520718896  |
| H | -1.52265247363496 | -3.55262283330910 | 3.65021281010283  |
| H | -3.02339322621820 | -2.79329223347293 | 3.08352254869873  |
| H | -2.28781072782862 | -4.10505109610164 | 2.14936155330060  |
| C | -0.17498947023594 | -5.22252665311655 | 1.51175683249098  |
| C | 0.45747396204530  | -5.12368393086497 | 2.75949210996342  |
| C | 0.58125275721268  | -6.23683322992237 | 3.58345673499826  |
| C | 0.08449619091589  | -7.47203341304806 | 3.17261804872309  |
| C | -0.53238782197698 | -7.58627032576317 | 1.92944886671438  |
| C | -0.66040082248906 | -6.47250603301110 | 1.10562053175071  |
| H | -1.15015067871464 | -6.56101207817198 | 0.13990963828250  |
| H | -0.91973698421295 | -8.54612069976955 | 1.60027735638700  |
| H | 0.18398153985238  | -8.34189259297640 | 3.81527130553036  |
| H | 1.07911849293408  | -6.14265233918011 | 4.54421642596165  |
| H | 0.87484593372581  | -4.16843084518194 | 3.06782081243869  |
| H | 0.56425502761682  | -4.94992252882721 | -1.25698429298581 |
| H | 0.72882057603408  | -1.50768536743034 | -5.12620333006502 |
| H | 0.12652268551097  | 1.12545946927755  | -5.30646409621194 |
| H | -2.15805789417391 | 4.44376240466266  | -1.88822708883860 |
| H | -2.98704036846417 | 4.05162046592131  | 0.64992605889464  |
| H | -3.23307368200680 | 1.78422409344287  | 3.26869739942217  |
| C | -2.95641039759215 | -0.79326133539222 | 4.46261264862602  |
| C | -2.09419913268995 | -1.40324929053156 | 5.38583875583901  |
| C | -2.56060972411413 | -1.81639033398545 | 6.62882290818469  |
| C | -3.89457712745315 | -1.61801493595739 | 6.97935798732293  |
| C | -4.75777789464089 | -1.00024935483146 | 6.07781478374630  |
| C | -4.29369449863936 | -0.59127620514487 | 4.83171169645344  |
| H | -4.97198531631003 | -0.12271678967266 | 4.12370452628914  |
| H | -5.79872857430875 | -0.83954910474556 | 6.34326910458154  |
| H | -4.25716737149405 | -1.93836049980347 | 7.95136907648279  |
| H | -1.87633603866151 | -2.28181789250004 | 7.33260134719896  |
| H | -1.04604883332818 | -1.52982396739744 | 5.12843639132998  |

## References:

- (1) J. P. T. Zaragoza, M. A. Siegler, and D. P. Goldberg, *Chem. Commun.* 2016, **52**, 167.
- (2) P. Jutzi, C. Müller, A. Stammler and H.-G. Stammler, *Organometallics* 2000, **19**, 1442.
- (3) S. Marque, H. Fischer, E. Baier and A. Studer, *J. Org. Chem.* 2001, **66**, 1146.
- (4) F. Neese, *Wiley Interdiscip. Rev. Comput. Mol. Sci.* 2012, **2**, 73.
- (5) C. Adamo and V. Barone, *J. Chem. Phys.* 1999, **110**, 6158.
- (6) M. Ernzerhof and G. Scuseria, *J. Chem. Phys.* 1999, **110**, 5029.
- (7) L. E. Roy, P. J. Hay and R. L. Martin, *J. Chem. Theory Comput.* 2008, **4**, 1029.
- (8) P. C. Hariharan and J. A. Pople, *Theor. Chim. Acta* 1973, **28**, 213.
- (9) M. M. Francl, *J. Chem. Phys.* 1982, **77**, 3654.
- (10) D. W. Demoin, Y. Li, S. S. Jurisson and C. A. Deakyne, *Comput. Theor. Chem.* 2012, **997**, 34.
- (11) G. M. Sheldrick, *Acta Crystallogr. Sect. C Struct. Chem.* 2015, **71**, 3.
- (12) A. L. Spek, *Acta Crystallogr. D Biol. Crystallogr.* 2009, **65**, 148.
